1 **Original article**

2 **A Mendelian randomization study of glycemc and anthropometric traits and Parkinson's disease**

3 **Running head:** Glucose, body weight and Parkinson's disease

4 Sandeep Grover<sup>1,2</sup> PhD, Ricarda Graf<sup>2</sup> BSc, Christine Klein<sup>3, 4</sup> MD, Norbert Brüggemann<sup>4,5,6</sup> MD, Inke R.  
5 König<sup>2</sup> PhD, Fabiola Del Greco M\*<sup>7</sup> PhD, Manu Sharma\*<sup>1</sup> PhD

6  
7 <sup>1</sup>Centre for Genetic Epidemiology, Institute for Clinical Epidemiology and Applied Biometry, University  
8 of Tübingen, Tübingen, Germany

9 <sup>2</sup>Institut für Medizinische Biometrie und Statistik, Universität zu Lübeck, Universitätsklinikum  
10 Schleswig-Holstein, Campus Lübeck, Germany

11 <sup>3</sup>Department of Psychiatry and Psychotherapy, University of Lübeck, Lübeck, Germany

12 <sup>4</sup>Institute of Neurogenetics, University of Lübeck, Lübeck, Germany

13 <sup>5</sup>Department of Neurology, University Medical Center Schleswig-Holstein, Campus Lübeck, Lübeck,  
14 Germany

15 Institute of Neurogenetics, University of Lübeck, Lübeck, Germany

16 <sup>6</sup>Center for Brain, Behavior, and Metabolism, University of Lübeck, Lübeck, Germany

17 <sup>7</sup>Institute for Biomedicine, Eurac Research, Bolzano, Italy

18 \* FDG and MS should be considered joint senior authors

19

20 **Corresponding Author:**

21 Dr Manu Sharma

22 E-Mail: manu.sharma@uni-tuebingen.de

23 Phone: 0049-7071-2978259

24

25 **Conflict of Interest**

26 All authors declare no conflicts of interests.

27 **Financial disclosure**

28

29

30 **Character count:**

31 Title: 93, Running head: 44

32 **Number of words:**

33 Abstract: 250, Body of the Manuscript: 3664 (Excluding abstract and references)

34 Number of Figures: 2; Number of Tables: 3

35 **Abstract**

36 **Background:** Impaired glucose and obesity are frequently observed in patients with Parkinson's disease  
37 (PD), although it is unclear whether the impairment precedes or results from the neurodegeneration.

38 **Objective:** We aimed to assess whether glycemic and anthropometric traits can influence the risk of PD  
39 in 33,674 cases and 449,056 healthy controls using the Mendelian randomization (MR) framework.

40 **Methods:** We investigated causality with a two-sample MR approach in the European population to  
41 compute effect estimates with summary statistics from available discovery meta-analyses of genome-wide  
42 association studies (GWAS) on glycemic and anthropometric traits.

43 **Results:** We considered a threshold of p-value=0.0038 as significant after accounting for multiple testing,  
44 and p-value<0.05 was considered to be a suggestive evidence for a potential association. We observed a  
45 protective effect of waist-hip ratio (WHR) on PD (Inverse variance-weighted (IVW): OR<sub>IVW</sub>=0.735;  
46 95%CI= 0.622–0.868; p-value=0.0003; I<sup>2</sup> index=22.0%; MR-Egger intercept p-value=0.1508; Cochran Q  
47 test p-value=0.0003). The association was further retained after the exclusion of overlapping UK biobank  
48 (UKB) samples between the WHR and PD datasets (OR<sub>IVW</sub>=0.791; 95%CI=0.659–0.950; p-value=0.012;  
49 I<sup>2</sup> index=13.0%; MR-Egger intercept p-value=0.733; Cochran Q test p-value=0.035). The sensitivity  
50 analysis provided suggestive evidence of an increased risk of PD on fasting glucose (FG) ( $\beta_{IVW}$ =0.0188;  
51 95%CI=0.0062–0.0313, p-value=0.0055; I<sup>2</sup> index=0.0%; MR-Egger intercept p-value=0.0957; Cochran Q  
52 test p-value=0.4555) and protective effect of PD on T2D (Weighted median effect: OR<sub>WME</sub>=0.946;  
53 95%CI=0.9290–0.983; p-value=0.0051; Weighted mode effect: OR<sub>MBE</sub>=0.943; 95%CI=0.904–0.983; p-  
54 value=0.0116).

55 **Conclusions:** Our results showed that central or abdominal obesity may be protective against PD  
56 development, independent of glucose levels.

57 **Keywords:** Mendelian randomization, Causal inference, Neurodegenerative disorders, Parkinson's  
58 disease, Glycemic traits, Type 2 diabetes, body weight, anthropometric traits

59

## 60 **Introduction**

61 The lack of neuroprotective or disease-modifying therapy has considerably hampered the management of  
62 Parkinson's disease (PD). However, several recent preclinical and clinical studies have shown the  
63 potential beneficial effects of type 2 diabetes (T2D) specific treatment in exerting neuroprotection against  
64 PD, possibly by modulating glucose homeostasis and body weight<sup>1-5</sup>. Traditionally, insulin has been  
65 implicated in the general hormonal regulation of glucose metabolism, as insulin crosses the blood-brain  
66 barrier to modulate brain energy homeostasis, with a minor contribution from internal neuronal secretion<sup>6</sup>.  
67 A recent study also reported significantly higher blood glucose in non-diabetic PD patients compared to  
68 healthy controls during an oral glucose tolerance test, with no significant increase in insulin levels<sup>7</sup>. The  
69 study further reported an association of higher blood glucose levels with a higher BMI. Recently, type 2  
70 diabetes (T2D) – characterized by high blood sugar, insulin resistance, and low insulin sensitivities – was  
71 shown to be associated with higher motor scores in patients with PD<sup>8</sup>. Change in body weight is also long  
72 known to occur during the clinical course of PD and with its treatment. A handful of observational studies  
73 with highly heterogeneous epidemiological study designs have investigated the association of body  
74 weight with PD, showing conflicting results although weight loss appears to be a consistent finding in  
75 more advanced PD<sup>9-12</sup>. In summary, inconclusive evidence from observational studies suggest that several  
76 highly correlated glycemic and anthropometric traits could alter the risk associated with development of  
77 PD. This could be attributed to limited sample sizes, presence of inherent confounding and reporting bias  
78 in observational studies.

79 Genome-wide association (GWAS) or meta-analyses of GWAS often have larger sample sizes  
80 with adequate coverage of the human genome, making GWAS-based Mendelian randomization (MR) an

81 attractive approach. MR has recently evolved as an alternative statistical approach that can, against  
82 potential confounding, judge potentially causal relationships between risk factors (e.g. altered glucose  
83 metabolism or body mass index) and an outcome (e.g. PD)<sup>13</sup>. In principle, MR allows the use of genetic  
84 variants as proxy representatives of exposure from one population to test an association with an outcome  
85 in a completely independent population. The approach mimics the randomization of exposure in  
86 randomized controlled trials (RCTs) and, thereby, addresses hidden confounding factors. To date, MR  
87 studies exploring the causal role of altered glucose or insulin homeostasis in PD are lacking. However, a  
88 previously published study explored the role of body mass index (BMI) on PD and showed a protective  
89 role of body mass index (BMI) (OR = 0.82, 95% CI = 0.69-0.98)<sup>14, 15</sup>. Most recently, the availability of  
90 GWAS datasets from the UK Biobank has further made it possible to take advantage of an increased  
91 power associated with a higher sample size by meta-analyzing it with previously existing large scale  
92 consortium datasets on various phenotypes of interest<sup>16-18</sup>.

93 In the present study, we expand the spectrum by assessing the impact and influence of several  
94 glycemic traits including 2-hour post-challenge glucose (2hrGlu), fasting glucose (FG), fasting insulin  
95 (FI), fasting insulin (FPI), homeostasis model assessment of  $\beta$ -cell function (HOMA-B), homeostasis  
96 model assessment of insulin resistance (HOMA-IR), glycated hemoglobin (HbA1c), Modified Stumvoll  
97 Insulin Sensitivity Index (ISI), and Type II diabetes (T2D) as well as anthropometric traits including body  
98 mass index (BMI), waist-hip ratio (WHR), waist circumference (WC), hip circumference (HC), adult  
99 height (AH) and birth weight (BW) on PD.

## 100 **Methods**

### 101 **Study design and identification of datasets**

102 We conducted a two-sample MR study using summary estimates to examine the lifelong effect of  
103 glycemic and anthropometric traits on the risk of PD in the European population. We reviewed the most  
104 recent meta-analyses of discovery GWAS datasets in the literature and identified genetic instruments that  
105 influence glycemic traits including 2hGlu, FG, FI, FPI, HOMA-B, HOMA-IR, HbA1c, ISI, T2D and  
106 anthropometric traits including BMI, WHR, WC, HC, AH, and BW<sup>16, 18-28</sup> (**Table 1**). For the outcome

107 dataset, we used the discovery cohort of a recent meta-analysis of GWAS on 33,674 PD cases and  
108 449,056 controls<sup>17</sup>.

### 109 **Prioritization of genetic variants**

110 We extracted significant SNPs from each GWAS dataset by employing a cutoff of  $5 \times 10^{-8}$ . All SNPs with  
111 F-statistics  $< 10$  were further excluded for a possible violation of MR assumption I<sup>13,29</sup>. A clumping  
112 window of 10,000 kb and linkage disequilibrium (LD; i.e.  $r^2$ ) cutoff of 0.001 was applied in the European  
113 population in the 1000Genome Phase 3v5 dataset to identify the leading SNP that represents each  
114 significantly associated locus<sup>30</sup>. If a specific leading SNP was not available in the PD dataset, a proxy  
115 SNP ( $r^2 > 0.8$ ) was identified by using the European population in the 1000Genome Phase 3v5 dataset,  
116 when possible. The statistical power to detect a causal association was estimated by the method described  
117 by Brion et al.<sup>31</sup>. Specifically, we set the sample size of the outcome dataset to 482,750 with 7.498% as  
118 proportion of PD patients in the dataset, a continuous exposure with a variance  $\geq 1\%$  and a threshold p-  
119 value of  $3.8 \times 10^{-3}$  (see the section below).

### 120 **Effect estimation using MR and test of pleiotropy**

121 We used the inverse variance-weighted (IVW) method with first order weights as primary method to  
122 investigate the direct causal role of glycemetic traits and anthropometric traits on PD<sup>16-28</sup>. If a genetic  
123 instrument consisted of a single SNP, we used the Wald ratio along with the delta method to estimate the  
124 causal effect and standard error, respectively. We applied a conservative Bonferroni correction to account  
125 for the number of 13 independent tests (local significance level =  $0.05/\text{number of tests}$ ) for a global  
126 significance of 0.05. All other results from statistical tests are interpreted descriptively. We used the  
127 intercept deviation test with MR-Egger's and MR-Egger intercept and the  $I^2$  index to evaluate the  
128 heterogeneity of Wald estimates. Additionally, we also estimated the Cochran Q statistic for the IVW  
129 method as well as Rucker's  $Q'$  statistics for the MR-Egger's method to evaluate the heterogeneity<sup>32-35</sup>.

### 130 **Sensitivity analysis**

131 We employed MR-Egger, weighted median (WME), and weighted mode methods (MBE) methods to  
132 check the reliability of estimates by relaxing some of the MR assumption, thereby allowing instruments  
133 with varying proportions of pleiotropic variants, as previously explained<sup>33, 36-39</sup>.  
134 To avoid the overlapping of samples from UK Biobank, which has been included in recently published  
135 GWAS, we computed casual effect estimates by using PD datasets without UK biobank samples, as used  
136 in the previous study (9,581 PD cases and 33,245 controls)<sup>35, 40, 41</sup>.  
137 For glyceic traits, a number of studies reported GWAS results from replication and/or pooled data  
138 (**Supplementary Table 1a**). We therefore compared our primary results with those using genetic  
139 instruments from these additional studies to explore the issue of the bias due to the winner's curse, led by  
140 the selection of the instruments done from the same dataset (discovery meta-analysis) used for the causal  
141 effect estimation.

142         Given that BMI has been shown to influence the role of glyceic and anthropometric traits on  
143 several diseases, including PD<sup>7</sup>, we also estimated the effect of genetic instruments adjusted for BMI for  
144 2hrGlu, FG, FI, ISI, T2D, and WHR to identify their overall influence on the causal effect estimates for  
145 PD. A summary of GWAS datasets used to study the influence of GWAS study design and BMI  
146 adjusted datasets is provided in **Supplementary Tables 1a and 1b** respectively.

147         We employed a leave-one and leave-one-group-out cross-validation approach to check the  
148 influence of outlier variants as well as that of variants known to be associated with confounders of the  
149 relationship between glyceic, and anthropometric traits and PD. We used the PhenoScanner database to  
150 identify potential pleiotropic genetic instruments that are known to be associated with potential  
151 confounders<sup>42</sup>. Finally, we conducted a reverse directional MR by identifying genetic variants  
152 representing proxy markers of PD using the same study.

## 153 **Results**

### 154 **Prioritization of genetic instruments and power analysis**

155 The depth of genomic coverage and number of individuals in different discovery GWAS datasets is  
156 provided in **Table 1**. The table further shows the variance explained by genetic instruments for different

157 exposure datasets and availability of genetic instruments in the PD dataset, estimated by the formula  
158  $2 \times \beta^2 \times \text{EAF} \times (1 - \text{EAF})$ , where  $\beta$  is the estimated genetic effect of the exposure and EAF is the  
159 corresponding allele frequency<sup>43</sup>.

160 Two glyceic exposures (HOMA-IR and ISI) were not further analyzed given the absence of  
161 significant variants; however, we analyzed them as outcome with the PD as exposure in the reverse  
162 causation investigation. Thus, the number of primary statistical tests was reduced to the investigation of  
163 the causal effect of seven glyceic traits and six anthropometric traits on PD, leading to 13 tests. The  
164 significance level was accordingly set to  $0.05/13 = 3.8 \times 10^{-3}$ .

165 Our power analysis suggests that our study has  $\approx 80\%$  power to detect a true OR of 1.208 or 0.799  
166 for PD per SD of the continuous phenotype assuming that the proportion of the continuous phenotype  
167 explained by the genetic instrument is  $\geq 1\%$  at a type 1 error rate of  $3.8 \times 10^{-3}$ .

#### 168 **Effect estimation and sensitivity analysis**

169 The causal effect estimates of glyceic traits and anthropometric traits on PD are shown in **Table**  
170 **2**, which also provides various measures to evaluate the robustness of the effect estimates. The summary  
171 data used to compute effect estimates and sensitivity analysis is further presented in **Supplementary**  
172 **Table 2**. Among all the glyceic and anthropometric traits, we found that a 1-standard deviation (SD)  
173 increase in waist-hip ratio (WHR) was associated with a 26.5% lower risk of PD in the European  
174 population ( $\text{OR}_{\text{IVW}}=0.735$ ; 95%CI=0.622–0.868 per 1-SD of WHR; p-value=0.0003;  $I^2=25.9\%$ ; MR-  
175 Egger intercept p-value=0.1508; Cochran Q test p-value=0.0003) (**Table 2a**). We further observed a  
176 similar effect using the WME method ( $\text{OR}_{\text{WME}}=0.810$ ; 95%CI=0.721–0.911). The distribution of  
177 individual SNP-level effect estimates along with the effect estimates computed through different MR  
178 methods for the effect of WHR on PD are shown as scatter and funnel plots in **Figure 1**. After ruling out  
179 the effect of weak instrument bias on account of overlapping UKB samples, the protective effect of WHR  
180 on PD was retained suggesting the reliability of the observed findings ( $\text{OR}_{\text{IVW}}=0.791$ ; 95% CI=0.659–  
181 0.950; p-value=0.012;  $I^2=13.0\%$ ; MR-Egger intercept p-value=0.733; Cochran Q test p-value=0.035).  
182 Using the PhenoScanner database, out of 357 SNPs WHR associated SNPs employed in causal effect

183 analysis; we identified a total of 127 pleiotropic SNPs that have been previously shown to be associated  
184 with non-anthropometric traits such as blood cell count, glycemic traits, lipid levels, and respiratory  
185 capacity (data not shown). In our sensitivity analysis that excluded these pleiotropic SNPs our instrument  
186 was weaker thus explaining the diminished protective effect estimate ( $OR_{IVW}=0.801$ ; 95% CI=0.640–  
187 1.000; p-value=0.052). The leave-one out sensitivity analysis also failed to show influence of any single  
188 SNP, suggesting reliability of our findings (data not shown here). We further observed a loss of  
189 association when using genetic instruments for WHR which were adjusted for BMI, suggesting a  
190 potential role of BMI in influencing the causal association with PD.

191 The observed findings of the potential causal role of anthropometric traits was further confirmed  
192 by the absence of the causal effect of any of the glycemic traits, including FG and T2D on PD. This lack  
193 of association of glycemic traits further persisted when we used genetic instruments that were prioritized  
194 from a small proportion of moderately associated SNPs which were followed up in a pooled cohort for  
195 2hGlu, FG, FI, and FPI (**Supplementary Table 3a**). Similarly, no association was observed for HOMA-B  
196 and HOMA-IR where genetic instruments were available for the replication cohorts. In addition, we did  
197 not observe any influence of the BMI-adjusted instruments that were available for 2hrGlu, FG, FI, and  
198 T2D, regardless of the GWAS study cohort that was used to extract the instrument (**Supplementary**  
199 **Table 3b**). With respect to other glycemic traits, we did not find genetic instruments for ISI. However, we  
200 were able to explore the causality using the single genetic instrument for BMI adjusted ISI phenotype  
201 which hinted at an association using genetic instruments prioritized from the discovery cohort only  
202 ( $OR_{wald} = 0.532$ , 95% CI=0.286-0.990; p-value=0.0464).

203 Lastly, we checked reliability of the observed relationships between various glycemic and  
204 anthropometric traits, and PD by conducting MR analyses in reverse direction, as shown in **Table 3**. We  
205 did not observe any causal effect of PD on WHR ( $\beta_{IVW}=-0.0077$ ; 95% CI=-0.0277–0.0122; p-  
206 value=0.4288;  $I^2=84.1\%$ ; MR-Egger intercept p-value=0.8462; Cochran Q test p-value<0.0001). On the  
207 contrary, in our sensitivity analysis we observed the strongest effect on FG with a 1-log odds increase in  
208 genetic predisposition to PD being associated with 0.0188 mmol/l increase in FG concentration ( $\beta_{IVW} =$



209 0.0188 per log-odds of PD; 95% CI=0.0062–0.0313; p-value=0.0055;  $I^2=0.0\%$ ; MR-Egger intercept p-  
210 value=0.0957; Cochran Q test p-value=0.4555). Additionally, although IVW method failed to detect  
211 influence of PD on T2D ( $OR_{IVW}=0.973$ ; 95% CI=0.921–1.028; p-value=0.3258;  $I^2=76.9\%$ ; MR-Egger  
212 intercept p-value=0.4711; Cochran Q test p-value= $5.28 \times 10^{-11}$ ), the genetic predisposition to PD was  
213 associated with approximately 5.0% lower risk of T2D using other methods ( $OR_{WME}=0.946$ ; 95%  
214 CI=0.930–0.973; p-value=0.0051;  $OR_{MBE}=0.943$ ; 95% CI=0.940–0.983; p-value=0.0116).

215 Our findings further motivated us to explore the triangulation relationship between the traits shown to be  
216 related to PD using the MR approach. Our data suggested a bidirectional causal relationship between T2D  
217 and FG as well as T2D and WHR (**Figure 2**) (data not shown). We further observed WHR as a potential  
218 risk factor for a higher FG with the absence of any effect of FG on WHR (**Figure 2**).

## 219 **Discussion**

220 The present study using a two-sample MR approach aimed to understand the role of glycemic and  
221 anthropometric on PD and observed that an increase in WHR is a strong protective factor for PD.  
222 Furthermore, sensitivity analyses provided suggestive evidence, though not conclusive, of higher glucose  
223 tolerance and protection against T2D in PD patients.

224 Dopamine neurotransmission in the human brain is known to modulate the rewarding properties  
225 of food. Previous studies have further shown that dopamine receptors are under expressed in obese  
226 individuals, thereby initiating a feedback loop to compensate for lower dopamine secretion<sup>44</sup>. It is,  
227 however, not known whether an altered dopaminergic metabolism in overweight individuals could  
228 influence the PD susceptibility. Several indicators have been used to measure overweight and obesity.  
229 While WHR and WC are predominantly used as measurements of central obesity, BMI is used as  
230 measurement of overall obesity. It has also been shown that WHR and WC may be regarded as better  
231 alternatives to BMI to measure obesity, especially in individuals with cardiovascular risk factors  
232 including T2D<sup>45, 46</sup>. Numerous observational studies have previously explored the association between  
233 both measures of obesity and PD with mixed results<sup>9, 10</sup>. A recent meta-analysis of ten cohort studies with  
234 2706 PD cases showed an absence of association of BMI with PD<sup>10</sup>. In contrast, a recent nationwide

235 health check-up data for the whole South Korean population comprising 44,205 incident cases identified  
236 risky association of abdominal obesity with PD (HR=1.13, 95% CI=1.10–1.16)<sup>9</sup>.  
237 Using an MR approach, we observed a significant risk reduction of 26.5% with every one unit of SD  
238 increase in WHR, while not observing any role of BMI. Our results are in contrast with a previously  
239 reported protective causal association of BMI with PD, which observed a significant risk reduction of  
240 18%<sup>14</sup>. The previous study however assessed 77 loci for exploring causal effect of BMI comprising  
241 13,708 PD cases and 95,282 controls compared to 548 loci assessed in a pooled dataset of 33,764 PD  
242 cases 449,056 controls in the present study. The discrepancy in the number of prioritized loci between the  
243 two studies is attributed to the use of GIANT dataset on BMI in the previous study compared to pooled  
244 dataset of GIANT and UKB on BMI used in the present study. Another recent MR study prioritizing  
245 genetic instruments using the UKB dataset only and exploring the casual role of 401 exposures did not  
246 detect a casual role of BMI and WHR<sup>15</sup>. Nevertheless, they observed a consistent protective causal  
247 association of nine adiposity related traits with the strongest effect observed for arm fat percentage. In  
248 line with our findings, these studies collectively argue that the assessment of fat mass vs. fat-free mass  
249 e.g. by using body plethysmography reflects the underlying causative or protective factors more closely  
250 than body weight or BMI. Interestingly, a recent study reported a slight reduction of 1.12% in PD risk for  
251 every 1kg/m<sup>2</sup> increase in BMI without any clear evidence of heterogeneity<sup>47</sup>. The study employed  
252 23andMe dataset for both BMI and PD datasets and the absence of heterogeneity in the observed findings  
253 possibly suggest that a considerable heterogeneity observed in previous MR studies could be attributed to  
254 the clinical heterogeneity among the commonly employed IPDGC PD cases. Our study provided strong  
255 evidence regarding the role of WHR in PD, nonetheless, further studies are highly warranted to  
256 disentangle the protective role of WHR in PD.

257         The results observed in our present study provided further suggest a potential role of glucose  
258 metabolism in PD, and data obtained herein agree with the previously published epidemiological studies.  
259 For example, a recent study reported a significantly higher area under time curve (AUC) for the blood  
260 glucose levels in 50 non-diabetic PD patients compared to 50 healthy controls during a 75g oral glucose

261 tolerance test ( $1187 \pm 229$  vs  $1101 \pm 201$  mmol/min.;  $p=0.05$ ), with no significant difference in AUC for  
262 blood insulin levels ( $6681 \pm 3495$  vs  $7271 \pm 6070$  mmol/min.;  $p=0.57$ )<sup>7</sup>. The study also reported that  
263 higher blood glucose levels were associated with higher BMI ( $p\text{-value}<0.0001$ ). Another recent  
264 longitudinal study identified high blood glucose as a risk marker for PD progression<sup>48</sup>. The 48-month  
265 follow-up study exploring the role of 44 clinical variables in 135 patients with early PD, identified high  
266 FG levels ( $p\text{-value}=0.013$ ) and T2D ( $p\text{-value}=0.033$ ), among several other factors as significant predictors  
267 of annual cognitive decline in PD. The study further observed significant differences in the baseline levels  
268 of glucose when compared to 109 healthy controls. Our results are henceforth in consent with these  
269 results suggesting that PD promotes dysregulation of glucose metabolism.

270 The relationship between PD and T2D as observed in our study is intriguing. We observed  
271 association only in sensitivity analyses. Thus, the results should be interpreted with caution. Nevertheless,  
272 several longitudinal studies have previously explored the influence of pre-existing T2D on the  
273 predisposition to PD with contradictory results. A prospective follow-up of 147,096 predominantly  
274 Caucasian participants in the Cancer Prevention Study II Nutrition Cohort from the United States found  
275 no association of the history of diabetes with PD risk ( $RR=0.88$ ; 95%  $CI=0.62\text{--}1.25$ )<sup>49</sup>. Another study that  
276 comprised two large US cohorts – the Nurses’ Health Study (121,046 women) and the Health  
277 Professionals Follow-up Study (50,833 men) – observed similar results ( $RR=1.04$ ; 95%  $CI=0.74\text{--}1.46$ )<sup>50</sup>.  
278 In contrast, a follow-up study in 51,552 Finnish individuals demonstrated an increased incidence of PD  
279 among patients with T2D ( $HR=1.85$ ; 95%  $CI=1.23\text{--}2.80$ )<sup>51</sup>. Most recently, a meta-analysis of four cohort  
280 studies (3284 PD cases and 32,695 diabetes cases) confirmed the finding that the onset of diabetes was a  
281 risk factor for PD ( $RR=1.37$ ; 95%  $CI=1.21\text{--}1.55$ )<sup>52</sup>. However, the same study reported the absence of an  
282 association in pooled populations of five case-control studies (6487 PD cases and 1387 diabetes cases;  
283  $OR=0.75$ ; 95%  $CI=0.50\text{--}1.11$ ). In summary, findings of the association between T2D and PD have been  
284 highly heterogeneous and could be attributed to the varying age of onset of T2D and PD. Indeed  
285 previously published meta-analysis showed that the earlier onset of T2D before the onset of PD found to  
286 be a major risk factor for future PD patients<sup>53</sup>. Our close examination of GWAS datasets used in our study

287 showed a remarkable variability in age of onset in PD and T2D subjects. For example, the majority of PD  
288 patients had an age of onset ranging from 48.9 to 71.2 years as compared to the average 52.5 years as an  
289 age of onset in T2D patients. Thus, it is conceivable that the earlier prodromal phase of PD, as compared  
290 to diabetes onset, could be protective against T2D in PD patients. Nevertheless, an in-depth clinical  
291 evaluation of PD subjects is highly warranted to further discern the role of T2D in PD etiology.

292         Despite our inability to stratify patients by the age of onset, our study has several strengths. We  
293 adopted a comprehensive approach that included several known markers of insulin metabolism. However,  
294 we observed that the genetic instruments for FI, HOMA-B, and HOMA-IR explained a very low amount  
295 of variance and, therefore, potential causation with PD might not be completely ruled out. An important  
296 limitation of this study could be the unavailability of individual-level data, which could have enabled us  
297 to confirm the absence of pleiotropic variants by using various potential confounding variables between  
298 WHR and PD. For instance, it is known that different markers of obesity show gender specific cut-offs  
299 and possibility of specific gender in influencing the observed causal estimates cannot be ruled out<sup>54, 55</sup>.  
300 Although we observed a suggestive reverse causal association of T2D with PD using different MR  
301 methods, we did not observe similar results with HbA1C, which is a known biomarker for prediabetes or  
302 diabetes. One of the reasons for this could be that the GWAS on HbA1c with 123,491 individuals from  
303 the general population was underpowered when compared to the GWAS on T2D that included 898,129  
304 individuals<sup>20, 21</sup>. Another potential limitation could be the existence of overlapping UKB samples  
305 between WHR and PD datasets, which could have led to possible bias in our findings. Nevertheless, our  
306 sensitivity analysis demonstrates retention of the association even after the exclusion of UKB samples  
307 from the PD dataset, highlighting the robustness of our novel finding<sup>56</sup>. Lastly, we could not conduct a  
308 causal association analysis among different glyceic traits within PD patients.

309         Despite these limitations, our study represents one of the most comprehensive studies to date that  
310 has explored the potential causal role of glyceic and anthropometric traits on PD. Our analyses suggest  
311 that central obesity may play a role in conferring protection against PD. An extensive sensitivity analysis  
312 further suggested a possible role of PD in altered glucose metabolism independent of insulin activity.

313 Furthermore, we showed that, despite high fasting glucose levels, PD patients may be protected against  
314 T2D. We further suggest the adoption of a cautionary approach when drawing clinical interpretations  
315 from the results of the current study, because additional lines of evidence may be generated, including the  
316 potential complex relationship of anthropometric, glycemic and PD with other unexplored traits.

317

### 318 **Author contributions**

319 1. Research project: A. Conception, B. Organization, C. Execution; 2. Statistical Analysis: A. Design, B.  
320 Execution, C. Review and Critique; 3. Manuscript Preparation: A. Writing of the first draft, B. Review  
321 and Critique;

322 **S.G.:** 1A, 1B, 1C, 2A, 2B, 3A;

323 **R.G.:** 2A, 2B;

324 **F.D.G.:** 2C;

325 **N.B.:** 3B

326 **C.K.:** 3B

327 **I.R.K.:** 2C, 3B;

328 **M.S.:** 1A, 1B, 2C, 3B

### 329 **Acknowledgments**

330 This study is, in-part, supported by the EU Joint Programme - Neurodegenerative Diseases Research  
331 (JPND) project under the aegis of JPND ([www.jpnd.eu](http://www.jpnd.eu)) through Germany, BMBF, funding code  
332 01ED1406. Dr. Sharma is further funded by the Michael J Fox Foundation, USA Genetic Diversity in PD  
333 Program: GAP-India Grant ID: 17473. and also supported by the grants from the German Research  
334 Council (DFG/SH 599/6-1 to M.S.), MSA Coalition, and Michael J Fox Foundation. This study was also  
335 supported by grants from the German Research Foundation (Research Unit ProtectMove, FOR 2488) to  
336 I.R.K., F.D.G., N.B., C.K).

337 Data on PD GWAS was contributed by IPDGC team and downloaded from <https://pdgenetics.org/>. Data  
338 on glycemic traits were contributed by MAGIC investigators and downloaded from

339 [www.magicinvestigators.org](http://www.magicinvestigators.org). Data on T2D were contributed by DIAGRAM investigators and  
340 downloaded from [www.diagram-consortium.org](http://www.diagram-consortium.org). Data on BMI, WHR, WC, HC and height were provided  
341 by GIANT consortium and downloaded from <https://portals.broadinstitute.org/collaboration/giant/>. Data  
342 on birth weight was provided by EEG consortium and downloaded from <https://egg-consortium.org/>.

343

## 344 **References**

- 345 1. Kim DS, Choi HI, Wang Y, Luo Y, Hoffer BJ, Greig NH. A New Treatment Strategy for  
346 Parkinson's Disease through the Gut-Brain Axis: The Glucagon-Like Peptide-1 Receptor Pathway. *Cell*  
347 *Transplant* 2017;26(9):1560-1571.
- 348 2. Katout M, Zhu H, Rutsky J, et al. Effect of GLP-1 mimetics on blood pressure and relationship to  
349 weight loss and glycemia lowering: results of a systematic meta-analysis and meta-regression. *Am J*  
350 *Hypertens* 2014;27(1):130-139.
- 351 3. Athauda D, Maclagan K, Skene SS, et al. Exenatide once weekly versus placebo in Parkinson's  
352 disease: a randomised, double-blind, placebo-controlled trial. *Lancet* 2017;390(10103):1664-1675.
- 353 4. Athauda D, Gulyani S, Karnati HK, et al. Utility of Neuronal-Derived Exosomes to Examine  
354 Molecular Mechanisms That Affect Motor Function in Patients With Parkinson Disease: A Secondary  
355 Analysis of the Exenatide-PD Trial. *JAMA Neurol* 2019;76(4):420-429.
- 356 5. Li Y, Perry T, Kindy MS, et al. GLP-1 receptor stimulation preserves primary cortical and  
357 dopaminergic neurons in cellular and rodent models of stroke and Parkinsonism. *Proc Natl Acad Sci U S*  
358 *A* 2009;106(4):1285-1290.
- 359 6. Kuwabara T, Kagalwala MN, Onuma Y, et al. Insulin biosynthesis in neuronal progenitors  
360 derived from adult hippocampus and the olfactory bulb. *EMBO Mol Med* 2011;3(12):742-754.
- 361 7. Marques A, Dutheil F, Durand E, et al. Glucose dysregulation in Parkinson's disease: Too much  
362 glucose or not enough insulin? *Parkinsonism Relat Disord* 2018;55:122-127.
- 363 8. Pagano G, Polychronis S, Wilson H, et al. Diabetes mellitus and Parkinson disease. *Neurology*  
364 2018;90(19):e1654-e1662.
- 365 9. Nam GE, Kim SM, Han K, et al. Metabolic syndrome and risk of Parkinson disease: A  
366 nationwide cohort study. *PLoS Med* 2018;15(8):e1002640.
- 367 10. Wang YL, Wang YT, Li JF, Zhang YZ, Yin HL, Han B. Body Mass Index and Risk of  
368 Parkinson's Disease: A Dose-Response Meta-Analysis of Prospective Studies. *PLoS One*  
369 2015;10(6):e0131778.

- 370 11. Wills AM, Perez A, Wang J, et al. Association Between Change in Body Mass Index, Unified  
371 Parkinson's Disease Rating Scale Scores, and Survival Among Persons With Parkinson Disease:  
372 Secondary Analysis of Longitudinal Data From NINDS Exploratory Trials in Parkinson Disease Long-  
373 term Study 1. *JAMA Neurol* 2016;73(3):321-328.
- 374 12. van der Marck MA, Dicke HC, Uc EY, et al. Body mass index in Parkinson's disease: a meta-  
375 analysis. *Parkinsonism Relat Disord* 2012;18(3):263-267.
- 376 13. Grover S, Del Greco MF, Stein CM, Ziegler A. Mendelian Randomization. *Methods Mol Biol*  
377 2017;1666:581-628.
- 378 14. Noyce AJ, Kia DA, Hemani G, et al. Estimating the causal influence of body mass index on risk  
379 of Parkinson disease: A Mendelian randomisation study. *PLoS Med* 2017;14(6):e1002314.
- 380 15. Noyce AJ, Bandres-Ciga S, Kim J, et al. The Parkinson's Disease Mendelian Randomization  
381 Research Portal. *Mov Disord* 2019;34(12):1864-1872.
- 382 16. Pulit SL, Stoneman C, Morris AP, et al. Meta-analysis of genome-wide association studies for  
383 body fat distribution in 694 649 individuals of European ancestry. *Hum Mol Genet* 2019;28(1):166-174.
- 384 17. Nalls MA, Blauwendraat C, Vallerga CL, et al. Identification of novel risk loci, causal insights,  
385 and heritable risk for Parkinson's disease: a meta-analysis of genome-wide association studies. *Lancet*  
386 *Neurol* 2019;18(12):1091-1102.
- 387 18. Yengo L, Sidorenko J, Kemper KE, et al. Meta-analysis of genome-wide association studies for  
388 height and body mass index in approximately 700000 individuals of European ancestry. *Hum Mol Genet*  
389 2018;27(20):3641-3649.
- 390 19. Scott RA, Lagou V, Welch RP, et al. Large-scale association analyses identify new loci  
391 influencing glycaemic traits and provide insight into the underlying biological pathways. *Nat Genet*  
392 2012;44(9):991-1005.
- 393 20. Wheeler E, Leong A, Liu CT, et al. Impact of common genetic determinants of Hemoglobin A1c  
394 on type 2 diabetes risk and diagnosis in ancestrally diverse populations: A transethnic genome-wide meta-  
395 analysis. *PLoS Med* 2017;14(9):e1002383.
- 396 21. Mahajan A, Taliun D, Thurner M, et al. Fine-mapping type 2 diabetes loci to single-variant  
397 resolution using high-density imputation and islet-specific epigenome maps. *Nat Genet*  
398 2018;50(11):1505-1513.
- 399 22. Manning AK, Hivert MF, Scott RA, et al. A genome-wide approach accounting for body mass  
400 index identifies genetic variants influencing fasting glycaemic traits and insulin resistance. *Nat Genet*  
401 2012;44(6):659-669.
- 402 23. Dupuis J, Langenberg C, Prokopenko I, et al. New genetic loci implicated in fasting glucose  
403 homeostasis and their impact on type 2 diabetes risk. *Nat Genet* 2010;42(2):105-116.

- 404 24. Strawbridge RJ, Dupuis J, Prokopenko I, et al. Genome-wide association identifies nine common  
405 variants associated with fasting proinsulin levels and provides new insights into the pathophysiology of  
406 type 2 diabetes. *Diabetes* 2011;60(10):2624-2634.
- 407 25. Saxena R, Hivert MF, Langenberg C, et al. Genetic variation in GIPR influences the glucose and  
408 insulin responses to an oral glucose challenge. *Nat Genet* 2010;42(2):142-148.
- 409 26. Walford GA, Gustafsson S, Rybin D, et al. Genome-Wide Association Study of the Modified  
410 Stumvoll Insulin Sensitivity Index Identifies BCL2 and FAM19A2 as Novel Insulin Sensitivity Loci.  
411 *Diabetes* 2016;65(10):3200-3211.
- 412 27. Shungin D, Winkler TW, Croteau-Chonka DC, et al. New genetic loci link adipose and insulin  
413 biology to body fat distribution. *Nature* 2015;518(7538):187-196.
- 414 28. Horikoshi M, Beaumont RN, Day FR, et al. Genome-wide associations for birth weight and  
415 correlations with adult disease. *Nature* 2016;538(7624):248-252.
- 416 29. Pichler I, Del Greco MF, Gogele M, et al. Serum iron levels and the risk of Parkinson disease: a  
417 Mendelian randomization study. *PLoS Med* 2013;10(6):e1001462.
- 418 30. Consortium GP, Auton A, Brooks LD, et al. A global reference for human genetic variation.  
419 *Nature* 2015;526(7571):68-74.
- 420 31. Brion MJ, Shakhbazov K, Visscher PM. Calculating statistical power in Mendelian  
421 randomization studies. *Int J Epidemiol* 2013;42(5):1497-1501.
- 422 32. Greco MF, Minelli C, Sheehan NA, Thompson JR. Detecting pleiotropy in Mendelian  
423 randomisation studies with summary data and a continuous outcome. *Stat Med* 2015;34(21):2926-2940.
- 424 33. Bowden J, Davey Smith G, Burgess S. Mendelian randomization with invalid instruments: effect  
425 estimation and bias detection through Egger regression. *Int J Epidemiol* 2015;44(2):512-525.
- 426 34. Rucker G, Schwarzer G, Carpenter JR, Binder H, Schumacher M. Treatment-effect estimates  
427 adjusted for small-study effects via a limit meta-analysis. *Biostatistics* 2011;12(1):122-142.
- 428 35. Grover S, Lill CM, Kasten M, Klein C, Del Greco MF, König IR. Risky behaviors and Parkinson  
429 disease: A mendelian randomization study. *Neurology* 2019;93(15):e1412-e1424.
- 430 36. Bowden J, Davey Smith G, Haycock PC, Burgess S. Consistent Estimation in Mendelian  
431 Randomization with Some Invalid Instruments Using a Weighted Median Estimator. *Genet Epidemiol*  
432 2016;40(4):304-314.
- 433 37. Burgess S BJ. Integrating summarized data from multiple genetic variants in Mendelian  
434 randomization: bias and coverage properties of inverse-variance weighted methods. *arXiv:151204486*  
435 2015.
- 436 38. Hartwig FP, Davey Smith G, Bowden J. Robust inference in summary data Mendelian  
437 randomization via the zero modal pleiotropy assumption. *Int J Epidemiol* 2017;46(6):1985-1998.



- 438 39. Grover S, Del Greco M F, Kasten M, Klein C, Lill CM, Koenig IR. Risky behaviors and  
439 Parkinson's disease: A Mendelian randomization study in up to 1 million study participants. *bioRxiv*  
440 2018.
- 441 40. Nalls MA, Pankratz N, Lill CM, et al. Large-scale meta-analysis of genome-wide association data  
442 identifies six new risk loci for Parkinson's disease. *Nat Genet* 2014;46(9):989-993.
- 443 41. Lill CM, Roehr JT, McQueen MB, et al. Comprehensive research synopsis and systematic meta-  
444 analyses in Parkinson's disease genetics: The PDGene database. *PLoS Genet* 2012;8(3):e1002548.
- 445 42. Staley JR, Blackshaw J, Kamat MA, et al. PhenoScanner: a database of human genotype-  
446 phenotype associations. *Bioinformatics* 2016;32(20):3207-3209.
- 447 43. Falconer DS, Mackay TFC. *Introduction to Quantitative Genetics*. 4 ed. Harlow, Essex, UK:  
448 Longmans Green, 1996.
- 449 44. Wang GJ, Volkow ND, Logan J, et al. Brain dopamine and obesity. *Lancet* 2001;357(9253):354-  
450 357.
- 451 45. Dalton M, Cameron AJ, Zimmet PZ, et al. Waist circumference, waist-hip ratio and body mass  
452 index and their correlation with cardiovascular disease risk factors in Australian adults. *J Intern Med*  
453 2003;254(6):555-563.
- 454 46. Janssen I, Katzmarzyk PT, Ross R. Body mass index, waist circumference, and health risk:  
455 evidence in support of current National Institutes of Health guidelines. *Arch Intern Med*  
456 2002;162(18):2074-2079.
- 457 47. Heilbron K, Jensen MP, Bandres-Ciga S, et al. Unhealthy Behaviours and Parkinsons Disease: A  
458 Mendelian Randomisation Study. *medRxiv* 2020:2020.2003.2025.20039230.
- 459 48. Mollenhauer B, Zimmermann J, Sixel-Doring F, et al. Baseline predictors for progression 4 years  
460 after Parkinson's disease diagnosis in the De Novo Parkinson Cohort (DeNoPa). *Mov Disord*  
461 2019;34(1):67-77.
- 462 49. Palacios N, Gao X, McCullough ML, et al. Obesity, diabetes, and risk of Parkinson's disease.  
463 *Mov Disord* 2011;26(12):2253-2259.
- 464 50. Simon KC, Chen H, Schwarzschild M, Ascherio A. Hypertension, hypercholesterolemia,  
465 diabetes, and risk of Parkinson disease. *Neurology* 2007;69(17):1688-1695.
- 466 51. Hu G, Jousilahti P, Bidel S, Antikainen R, Tuomilehto J. Type 2 diabetes and the risk of  
467 Parkinson's disease. *Diabetes Care* 2007;30(4):842-847.
- 468 52. Cereda E, Barichella M, Pedrolli C, et al. Diabetes and risk of Parkinson's disease: a systematic  
469 review and meta-analysis. *Diabetes Care* 2011;34(12):2614-2623.
- 470 53. Xu Q, Park Y, Huang X, et al. Diabetes and risk of Parkinson's disease. *Diabetes Care*  
471 2011;34(4):910-915.

- 472 54. Schorr M, Dichtel LE, Gerweck AV, et al. Sex differences in body composition and association  
473 with cardiometabolic risk. *Biol Sex Differ* 2018;9(1):28.
- 474 55. Macek P, Biskup M, Terek-Derszniak M, et al. Optimal cut-off values for anthropometric  
475 measures of obesity in screening for cardiometabolic disorders in adults. *Sci Rep* 2020;10(1):11253.
- 476 56. Burgess S, Davies NM, Thompson SG. Bias due to participant overlap in two-sample Mendelian  
477 randomization. *Genetic epidemiology* 2016;40(7):597-608.

478

## 479 **List of figures and tables**

480 **Figure 1.** Graphical representation of causal association analysis and assessment of pleiotropy

481 **A.** Scatterplot showing causal effect estimates computed using various MR methods for the association of  
482 Parkinson disease (PD) as exposure with Waist Hip Ratio (WHR) as an outcome.

483 **B.** Funnel plot showing the extent of heterogeneity among the individual Wald ratio estimates for the  
484 association of Parkinson disease (PD) as exposure with Waist Hip Ratio (WHR) as an outcome.

485 **Figure 2.** Graphical representation of causal relationship between Parkinson's disease, glycemic and  
486 anthropometric traits. \*Effect estimate computed using weighted median effect method (WME).

487

488 **Table 1.** Details of the discovery GWAS datasets that explored and prioritized genetic instruments used  
489 for direct and reverse casual analysis in the present study. The direct analysis was done using Parkinson's  
490 disease (PD) as an outcome, and the reverse was done using glycemic traits and modifiable  
491 anthropometric traits as an outcome.

492 **Table 2.** Causal effect estimates using different Mendelian randomization (MR) methods and  
493 heterogeneity analysis of causal effect estimates for Parkinson's disease (PD) by using various (a)  
494 glycemic traits as exposures. (b) anthropometric traits as exposures.

495 **Table 3.** Causal effect estimates using different Mendelian randomization methods and heterogeneity  
496 analysis of causal effect estimates for various (a) glycemic traits and (b) modifiable anthropometric traits  
497 by using Parkinson's disease as an exposure.

498 **Supplementary Table 1a.** Details of follow-up genetic variants in the replication and pooled exposure  
499 GWAS datasets and prioritized genetic instruments used for the secondary analysis

500 **Supplementary Table 1b.** Details of exposure GWAS datasets adjusted for BMI and prioritized genetic  
501 instruments used for the sensitivity analysis

502 **Supplementary Table 2.** Harmonized summary effect estimates from exposure and outcome datasets  
503 used for the conduct of Mendelian randomization (MR)

504 **Supplementary Table 3.** Sensitivity analysis exploring the (a) influence of GWAS study design (b) BMI  
505 adjusted traits on causal effect estimates

506 **Financial disclosures**

507

|                                             |                                                                                                                                      |
|---------------------------------------------|--------------------------------------------------------------------------------------------------------------------------------------|
| Author                                      | Sandeep Grover                                                                                                                       |
| Stock Ownership in medically-related fields | None                                                                                                                                 |
| Consultancies                               | None                                                                                                                                 |
| Advisory Boards                             | None                                                                                                                                 |
| Partnerships                                | None                                                                                                                                 |
| Honoraria                                   | None                                                                                                                                 |
| Grants                                      | None                                                                                                                                 |
| Intellectual Property Rights                | None                                                                                                                                 |
| Expert Testimony                            | None                                                                                                                                 |
| Employment                                  | Centre for Genetic Epidemiology, Institute for Clinical Epidemiology and Applied Biometry, University of Tübingen, Tübingen, Germany |

|           |      |
|-----------|------|
| Contracts | None |
| Royalties | None |
| Other     | None |

508

|                                             |                                                                                |
|---------------------------------------------|--------------------------------------------------------------------------------|
| Author                                      | Ricarda Graf                                                                   |
| Stock Ownership in medically-related fields | None                                                                           |
| Consultancies                               | None                                                                           |
| Advisory Boards                             | None                                                                           |
| Partnerships                                | None                                                                           |
| Honoraria                                   | None                                                                           |
| Grants                                      | None                                                                           |
| Intellectual Property Rights                | None                                                                           |
| Expert Testimony                            | None                                                                           |
| Employment                                  | Institut für medizinische Statistik, Universität Göttingen, Göttingen, Germany |
| Contracts                                   | None                                                                           |
| Royalties                                   | None                                                                           |
| Other                                       | None                                                                           |

509

|                                             |                                                            |
|---------------------------------------------|------------------------------------------------------------|
| Author                                      | Christine Klein                                            |
| Stock Ownership in medically-related fields | None                                                       |
| Consultancies                               | Medical Consultant for Centogene and Retromer Therapeutics |
| Advisory Boards                             | Else Kroener Fresenius Foundation                          |
| Partnerships                                | None                                                       |

|                              |                                                                     |
|------------------------------|---------------------------------------------------------------------|
| Honoraria                    | Speaking Honorarium (Desitin)                                       |
| Grants                       | DFG, EU, BMBF, MJFF, Centogene                                      |
| Intellectual Property Rights | None                                                                |
| Expert Testimony             | None                                                                |
| Employment                   | University of Luebeck and University Hospital of Schleswig Holstein |
| Contracts                    | None                                                                |
| Royalties                    | Oxford University Press                                             |
| Other                        | None                                                                |

510

|                                             |                                                                                                    |
|---------------------------------------------|----------------------------------------------------------------------------------------------------|
| Author                                      | Norbert Brüggemann                                                                                 |
| Stock Ownership in medically-related fields | None                                                                                               |
| Consultancies                               | Centogene, Bridgebio                                                                               |
| Advisory Boards                             | Bridgebio                                                                                          |
| Partnerships                                | None                                                                                               |
| Honoraria                                   | None                                                                                               |
| Grants                                      | DFG (BR4328.2-2, GRK1957)                                                                          |
| Intellectual Property Rights                | None                                                                                               |
| Expert Testimony                            | None                                                                                               |
| Employment                                  | University Medical Center Schleswig-Holstein Lübeck, Department of Neurology; University of Lübeck |
| Contracts                                   | None                                                                                               |
| Royalties                                   | None                                                                                               |
| Other                                       | None                                                                                               |

511

|                                             |                                                     |
|---------------------------------------------|-----------------------------------------------------|
| Author                                      | Inke R. König                                       |
| Stock Ownership in medically-related fields | None                                                |
| Consultancies                               | None                                                |
| Advisory Boards                             | None                                                |
| Partnerships                                | None                                                |
| Honoraria                                   | None                                                |
| Grants                                      | German Research Foundation, BMBF, German Cancer Aid |
| Intellectual Property Rights                | None                                                |
| Expert Testimony                            | None                                                |
| Employment                                  | University of Lübeck, Germany                       |
| Contracts                                   | None                                                |
| Royalties                                   | None                                                |
| Other                                       | None                                                |

512

|                                             |                                |
|---------------------------------------------|--------------------------------|
| Author                                      | Fabiola Del Greco M            |
| Stock Ownership in medically-related fields | None                           |
| Consultancies                               | None                           |
| Advisory Boards                             | None                           |
| Partnerships                                | None                           |
| Honoraria                                   | None                           |
| Grants                                      | None                           |
| Intellectual Property Rights                | None                           |
| Expert Testimony                            | None                           |
| Employment                                  | Eurac research, Bolzano, Italy |

|           |      |
|-----------|------|
| Contracts | None |
| Royalties | None |
| Other     | None |

513

|                                             |                                                                                                                                      |
|---------------------------------------------|--------------------------------------------------------------------------------------------------------------------------------------|
| Author                                      | Manu Sharma                                                                                                                          |
| Stock Ownership in medically-related fields | None                                                                                                                                 |
| Consultancies                               | None                                                                                                                                 |
| Advisory Boards                             | None                                                                                                                                 |
| Partnerships                                | None                                                                                                                                 |
| Honoraria                                   | None                                                                                                                                 |
| Grants                                      | Michael J Fox Foundation, DFG, MSA Coalition                                                                                         |
| Intellectual Property Rights                | None                                                                                                                                 |
| Expert Testimony                            | None                                                                                                                                 |
| Employment                                  | Centre for Genetic Epidemiology, Institute for Clinical Epidemiology and Applied Biometry, University of Tübingen, Tübingen, Germany |
| Contracts                                   | None                                                                                                                                 |
| Royalties                                   | None                                                                                                                                 |
| Other                                       | None                                                                                                                                 |

514

A. Scatterplot showing causal effect estimates

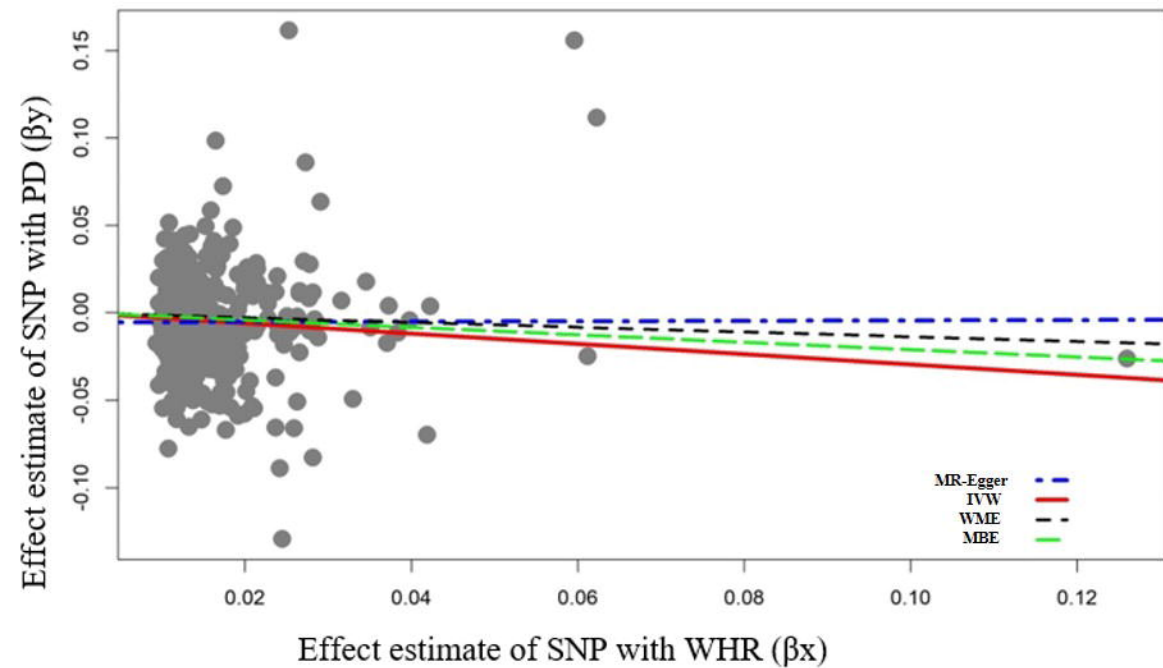

B. Funnel plot showing individual SNP level causal effect estimates

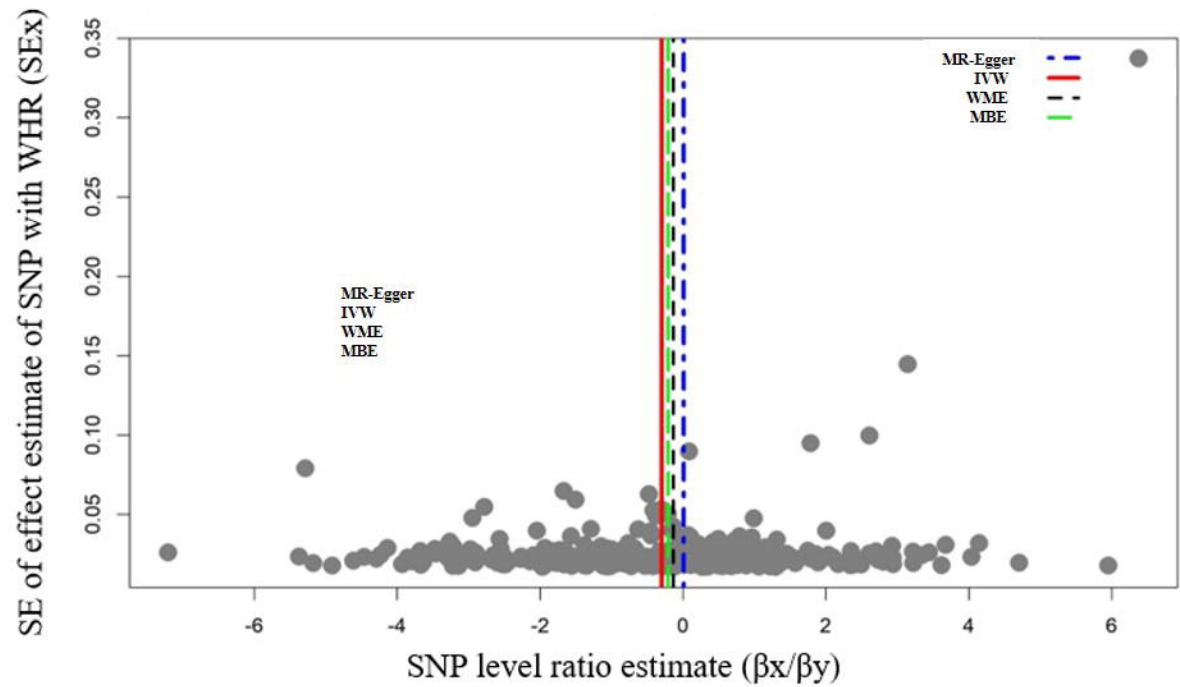



# Type 2 Diabetes (T2D)

# Parkinsons Disease (PD)

# Fasting Glucose (FG)

# Waist Hip Ratio (WHR)

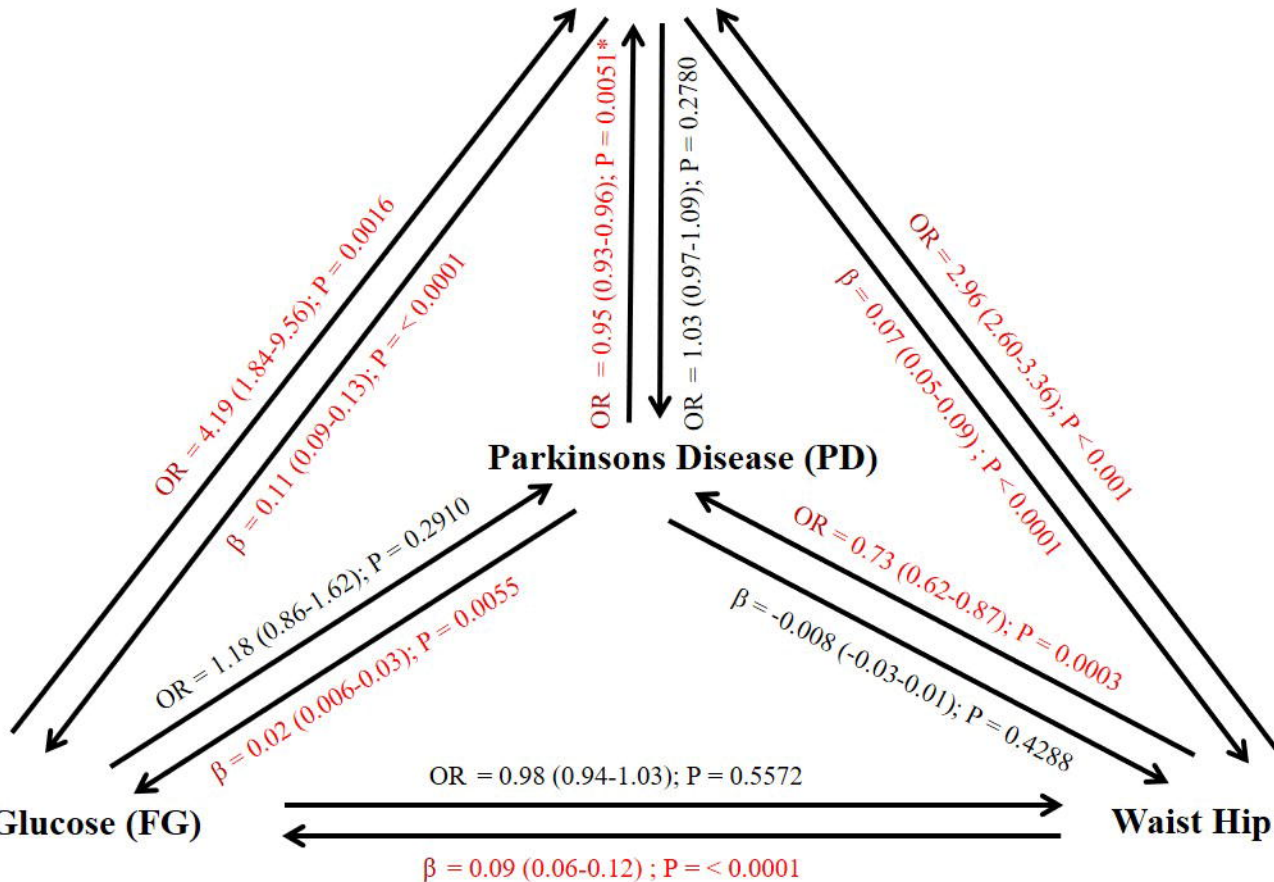

Source: https://www.biorxiv.org/content/10.1101/2020.03.31.017566v2.full.pdf
