1 **Original article**

2 **A bi-directional Mendelian randomization study of glycemic and anthropometric traits and**  
3 **Parkinson's disease**

4 **Running head:** Glucose, body weight and Parkinson's disease

5 Sandeep Grover<sup>1</sup>, Ricarda Graf<sup>2</sup>, Alastair Noyce<sup>3</sup>, International Parkinson's Disease Genomics

6 Consortium (IPDGC), Manu Sharma<sup>1</sup>

7 <sup>1</sup>Centre for Genetic Epidemiology, Institute for Clinical Epidemiology and Applied Biometry, University  
8 of Tübingen, Tübingen, Germany

9 <sup>2</sup>Universität zu Lübeck, Universitätsklinikum Schleswig-Holstein, Campus Lübeck, Lübeck, Germany

10 <sup>3</sup>Preventive Neurology Unit, Wolfson Institute of Preventive Medicine, Queen Mary University of  
11 London, London, UK.

12 **Corresponding Author:**

13 Dr Manu Sharma

14 E-Mail: manu.sharma@uni-tuebingen.de

15 Phone: 0049-7071-2978259

16

17 **Character count:**

18 Title: 96, Running head: 39

19 **Number of words:**

20 Abstract: 350, Body of the Manuscript: 2999 (Excluding abstract and references)

21 Number of Figures: 2; Number of Tables: 3

22

23

24

25

26

27 **Key points**

28 **Question:** Are glucose and obesity associated with Parkinson's disease?

29 **Findings:** Using bi-directional Mendelian randomization (MR) approach, and using Parkinson disease  
30 (PD) as an exposure, our study found that a 1-log odds increase in genetic predisposition to PD was  
31 associated with 0.0188 mmol/l increase in fasting glucose concentration. The genetic predisposition to PD  
32 was also associated with a 5.4% lower risk of type-2 diabetes (T2D). We found that a 1-SD increase in  
33 waist-hip ratio (WHR) was associated with a 26.5% lower risk of PD in the European population, likely  
34 to be mediated via body mass index.

35 **Meaning:** A strong genetic predisposition towards glucose tolerance was observed in PD patients. and  
36 PD patients are protective against T2D. Further, an increase in WHR lowers the risk of PD. Our study  
37 thereby suggests potential roles of body fat distribution and glycemic traits on PD symptomatology.

38

39

40

41

42

43

44

45

46

47

48

49

50

51

52

53 **Abstract**

54 **Importance:** Impaired glucose and obesity are known characteristics of patients with PD, although it is  
55 unclear whether the dysfunction precedes or results from the neurodegeneration.

56 **Objective:** To assess whether glycemic traits and anthropometric traits can influence the risk of PD in  
57 33,674 cases and 449,056 healthy controls using Mendelian randomization (MR) framework.

58 **Design, setting, and participants:** We investigated causality with a two-sample bidirectional MR  
59 approach in the European population. We used the inverse variance-weighted (IVW), weighted median  
60 (WME), and weighted mode (MBE) methods to compute effect estimates with summary statistics from  
61 available meta-analyses of genome-wide association studies (GWAS) on glycemic and anthropometric  
62 traits that used discovery cohorts. We conducted sensitivity analyses with prioritized genetic instruments  
63 that used different study designs including employment of different study cohorts and body mass index  
64 (BMI) adjusted exposures, and exclusion of overlapping samples between risk factors and outcome  
65 datasets, and potential pleiotropic genetic instruments.

66 **Main outcome and measures:** PD, glycemic and anthropometric traits

67 **Results:** We observed a risky effect of PD on fasting glucose (FG) (IVW:  $\beta = 0.0188$  per log-odds of PD;  
68 95% CI 0.0062–0.0313, p-value = 0.0055). We further observed a protective effect of PD on type 2  
69 diabetes (T2D) (WME: OR = 0.946 per log-odds of PD; 95% CI 0.929–0.983, p-value = 0.0051). A direct  
70 causal role of waist-hip ratio (WHR) was also observed in PD (IVW OR = 0.735; 95% CI = 0.622-0.868  
71 per 1-SD of WHR, p = 0.0003). However, the association was lost after WHR was adjusted for body mass  
72 index (BMI) (IVW OR = 0.889; 95% CI = 0.779-1.037 per 1-SD of WHR adjusted for BMI, p = 0.1429)  
73 indicating that the observed association is mediated via BMI The associations were further retained after  
74 the exclusion of overlapping UK Biobank (UKB) samples in the PD dataset.

75 **Conclusions and relevance:** Our results showed that PD patients are glucose tolerant with protection  
76 against T2D. Furthermore, central obesity may be protective against PD development, independent of  
77 glucose levels. The implication of different indices of glycemic control and body fat distribution on the  
78 PD symptomatology deserves further investigation.

79 **Keywords:** Mendelian randomization, Causal inference, Neurodegenerative disorders, Parkinson's  
80 disease, Glycemic traits, Type 2 diabetes, body weight, anthropometric traits

81

## 82 **Introduction**

83 The lack of neuroprotective or disease-modifying therapy has considerably hampered the management of  
84 PD. However, several recent preclinical and clinical studies have shown the potential beneficial effects of  
85 pharmacotherapy that promotes blood glucose-dependent insulin secretion and weight reduction on PD<sup>1,2</sup>.

86 Traditionally, insulin has been implicated in the general hormonal regulation of glucose  
87 metabolism, as insulin crosses the blood-brain barrier to modulate brain energy homeostasis, with a minor  
88 contribution from internal neuronal secretion<sup>3</sup>. Several studies have demonstrated an association between  
89 impaired cortical glucose metabolism in specific brain regions and cognitive decline in patients with  
90 PD<sup>4,5</sup>. Preclinical studies in insulin-resistant models of neurodegeneration have shown the influence of  
91 insulin on dopaminergic cell death and dopamine expression, which induce severe motor and anxiety-like  
92 behavior<sup>6-8</sup>. Recently, T2D – characterized by high blood sugar, insulin resistance, and low insulin levels  
93 – was shown to be associated with higher motor scores in patients with PD<sup>9</sup>. Change in body weight is  
94 also long known to occur during the clinical course of Parkinson's disease (PD) and with the treatment of  
95 PD. A handful of observational studies with highly heterogeneous epidemiological study designs have  
96 investigated the association of body weight with PD, showing conflicting results<sup>10-12</sup>.

97 Mendelian randomization (MR) has recently evolved as an alternative statistical approach that  
98 can, against potential confounding, judge potential causal relationships between risk factors (e.g. altered  
99 glucose metabolism or body mass index) and an outcome (e.g. PD)<sup>13,14</sup>. In principle, MR allows the use of  
100 genetic variants as proxy representatives of exposure from one population to test an association with an  
101 outcome in a completely independent population<sup>15</sup>. Genetic variants are randomly distributed at birth, and  
102 the process mimics the randomization of exposure in randomized controlled trials (RCTs) and, thereby,  
103 addresses hidden confounding factors<sup>16</sup>.

104 To date, MR studies exploring the causal role of altered glucose or insulin homeostasis in PD are  
105 lacking. However, our previously published study explored the role of body mass index (BMI) on PD<sup>17</sup>  
106 and showed a protective role of body mass index (BMI) (OR = 0.82, 95% CI = 0.69-0.98)<sup>17</sup>. Most  
107 recently, the availability of GWAS datasets from the UK Biobank has further made possible to take  
108 advantage of increased power associated with a higher sample size by meta-analyzing it with previously  
109 existing large scale consortium datasets on various phenotypes of interest<sup>18-20</sup>.

110 In the present study, we expanded the spectrum of assessing the impact and influence of several  
111 glycemic traits including 2-hour post-challenge glucose (2hrGlu), fasting glucose (FG), fasting insulin  
112 (FI), fasting insulin (FPI), homeostasis model assessment of  $\beta$ -cell function (HOMA-B); homeostasis  
113 model assessment of insulin resistance (HOMA-IR); glycated hemoglobin (HbA1c), Modified Stumvoll  
114 Insulin Sensitivity Index (ISI), and T2D and anthropometric traits include body metabolic index (BMI),  
115 waist-hip ratio (WHR), waist circumference (WC), hip circumference (HC), adult height (AH) and birth  
116 weight (BW) on PD. We used inverse variance-weighted (IVW), MR-Egger, weighted median (WME),  
117 and weighted mode methods (MBE) to investigate the direct causal role of glycemic traits and  
118 anthropometric traits on PD<sup>18-30</sup>. As a secondary analysis, we further employed a reverse directional MR  
119 to confirm our findings.

## 120 **Methods**

### 121 **Study design and identification of datasets**

122 We conducted a two-sample MR study through the use of summary estimates to examine the lifelong  
123 effect of glycemic and anthropometric traits on the risk of PD in the European population. We reviewed  
124 the most recent meta-analyses of discovery GWAS datasets in the literature and identified genetic  
125 instruments that influence glycemic traits including 2hGlu, FG, FI, HOMA-B, HOMA-IR, HbA1c, ISI,  
126 T2D and anthropometric traits including BMI, WHR, WC, HC, AH, and BW<sup>18,20-30</sup> (**Table 1**). With  
127 respect to the outcome dataset, we used the discovery cohort of a recent meta-analysis of GWAS on

128 33674 PD cases and 449056 controls<sup>19</sup>. We further identified genetic variants representing proxy markers  
129 of PD by using the same study to conduct a reverse directional MR.

### 130 **Prioritization of genetic variants**

131 We extracted significant SNPs from each GWAS dataset by employing a cutoff of  $5 \times 10^{-8}$ . All SNPs with  
132 F-statistics  $< 10$  were further excluded for a possible violation of MR Assumption I<sup>31</sup>. Loci known to be  
133 directly involved in PD were also excluded for a possible violation of MR Assumption III, based on the  
134 existing evidence from previously published GWAS studies and relevant literature<sup>32</sup>. A clumping window  
135 of 10,000 kb and linkage disequilibrium (LD; i.e.  $r^2$ ) cutoff of 0.001 was applied in the European  
136 population in the 1000Genome Phase 3v5 dataset to identify the leading SNP that represents each  
137 significantly associated locus<sup>33</sup>. If a specific leading SNP was not available in the PD dataset, a proxy  
138 SNP ( $r^2 > 0.8$ ) was identified by using the European population in the 1000Genome Phase 3v5 dataset,  
139 when possible. The statistical power to detect a causal association was calculated by the method described  
140 by Brion et al<sup>34</sup>. Based on the method, we used a sample size of outcome dataset of 482750 with a  
141 7.498% as proportion of PD patients in the dataset, a continuous exposure with a variance  $\geq 1\%$  and a  
142 threshold p-value of  $3.3 \times 10^{-3}$  (see the section below).

### 143 **Effect estimation using MR and test of pleiotropy**

144 The IVW effect method with second-order weights was employed as the primary method to compute  
145 causal effect estimates<sup>35</sup>. We applied a conservative Bonferroni correction to account for 15 independent  
146 tests (threshold p-value =  $3.3 \times 10^{-3}$ , i.e. 0.05/15). We used Cochran Q-statistics and  $I^2$  for the IVW  
147 method as well as Rucker's Q-statistics and the Intercept deviation test with MR-Egger's method<sup>36-39</sup>.

### 148 **Sensitivity analysis**

149 We employed MR-Egger, WME, and MBE methods to check the reliability of estimates with varying  
150 proportions of pleiotropic variants, as previously explained<sup>37,39-42</sup>. We further compared the results with  
151 genetic instruments from studies that reported discovery, replication, and pooled cohorts. The BMI has  
152 been shown to influence the role of glycemic and anthropometric traits on several diseases, including  
153 PD<sup>43</sup>. Therefore, we estimated the effect of genetic instruments adjusted for BMI for 2hrGlu, FG, FI, ISI,

154 T2D, and WHR to identify their overall influence on the causal effect estimates for PD. A summary of  
155 GWAS datasets used to study the influence of GWAS study design and BMI adjusted datasets is provided  
156 in **Supplementary Table 1**. We employed a leave-one and leave-one-group-out cross-validation  
157 approach to check the influence of outlier variants as well as that of variants known to be associated with  
158 confounders of the relationship between glycemic, and anthropometric traits and PD. In addition, we  
159 employed graphical approaches, including a scatter plot of individual SNP-level effect estimates among  
160 exposure and outcome datasets and a funnel plot of the spread of inverse of the standard error of  
161 individual SNP-level effect estimates, around the effect estimates computed by various MR methods. We  
162 used the PhenoScanner database to identify potential pleiotropic genetic instruments that are known to be  
163 associated with potential confounders<sup>44</sup>. To avoid the overlapping of samples from UK Biobank, which  
164 has been included in recently published GWAS, we computed casual effect estimates by using PD  
165 datasets without UK biobank samples, as used in the previous study (9,581 PD cases and 33,245  
166 controls)<sup>32,45,46</sup>.

## 167 **Results**

### 168 **Prioritization of genetic instruments and power analysis**

169 The depth of genomic coverage and number of individuals in different discovery GWAS datasets on have  
170 been provided in **Table 1**. The table further shows variance explained by genetic instruments for different  
171 exposure datasets and availability of genetic instruments in the PD dataset.

172 Our power analysis suggest that our study has  $\approx 80\%$  power to detect a true OR of 1.210 or 0.789  
173 for PD per SD of the continuous phenotype assuming that the proportion of the continuous phenotype  
174 explained by the genetic instrument is  $\geq 1\%$  at a type 1 error rate of  $3.3 \times 10^{-3}$ .

### 175 **Effect estimation and sensitivity analysis**

176 The direct and reverse causal effect estimates of glycemic traits and anthropometric traits with PD are  
177 shown in **Tables 2** and **3**, both of which also provides various measures to evaluate the robustness of the  
178 effect estimates. Overall summary data used to compute effect estimates and sensitivity analysis are  
179 presented in **Supplementary Table 2**

180 Using a bidirectional MR approach, we observed a risky casual effect of PD on FG using IVW  
181 and MR Egger methods (**Table 3**). We observed a protective role of PD on T2D with the WME and MBE  
182 methods (**Table 3**). We observed high heterogeneity (76.8%) in the association of PD with T2D which  
183 could be attributed to the small number of genetic variants used as instruments for PD. However, the  
184 pleiotropic tests demonstrated there was a negligible effect on the overall results (MR-Egger intercept p-  
185 value = 0.4711 and Rucker's test statistic/Cochrane Q-statistic = 0.9685). The distribution of individual  
186 SNP-level effect estimates along with the effect estimates computed through different MR methods for  
187 the effect of PD on FG and T2D are shown as scatter and funnel plots in **Figure 1**. Our sensitivity  
188 analysis excluding individual SNPs in the causal effect estimation of PD on both FG and T2D failed to  
189 show the influence of outlier or potential pleiotropic SNP, thereby confirming the robustness of our  
190 findings (**Supplementary Table 3**).

191 The observed findings were further confirmed by the absence of the causal effect of any of the  
192 glycemic traits, including FG and T2D on PD. This lack of association further persisted when we used  
193 genetic instruments that were prioritized from a small proportion of moderately associated SNPs which  
194 were followed up in a pooled cohort for 2hGlu, FG, FI, and FPI (**Supplementary Table 4**). Similarly, no  
195 association was observed for HOMA-B and HOMA-IR where genetic instruments were available for the  
196 replication cohorts. In addition, we did not observe any influence of the BMI-adjusted instruments that  
197 were available for 2hrGlu, FG, FI, and T2D, regardless of the GWAS study cohort that was used to  
198 extract the instrument (**Supplementary Table 4**). With respect to other glycemic traits, we could not find  
199 genetic instruments for ISI. However, we were able to evaluate the causality using the genetic instruments  
200 for BMI adjusted ISI phenotype. We observed association using genetic instruments prioritized from the  
201 discovery cohort only. However, the observed association could not withstand the Bonferroni's  
202 correction.

203 Among all the anthropometric traits, we observed a significant protective effect of WHR on PD  
204 (**Table 2**). However, we observed loss of association when we used genetic instruments for WHR, which  
205 was adjusted for BMI, suggesting that the role of BMI in influencing genetic predisposition to PD. Using



206 the phenoscanner database, out of 357 SNPs WHR associated SNPs employed in causal effect analysis;  
207 we further identified a total of 127 pleiotropic SNPs that have been previously shown to be associated  
208 with non-anthropometric traits such as blood cell count, glycemic traits, lipid levels, and respiratory  
209 capacity (Data not shown). Our sensitivity analysis by excluding these pleiotropic SNPs demonstrated  
210 existence of protective trend in the effect estimate (OR = 0.801, 95% CI = 0.640-1.00, p = 0.052).  
211 However, the loss of association may be attributed to the overall loss of variance in the genetic instrument  
212 used for the sensitivity analysis.

213 Lastly, to rule out the effect of weak instrument bias on account of overlapping UKB samples, we  
214 used PD dataset without UKB samples. The protective effect of PD on T2D as well as the risky effect of  
215 WHR on PD were retained suggesting the reliability of the observed findings (PD on T2D: WME: OR =  
216 0.954, 95% CI = 0.938–0.970, p = 0.0094; MBE: OR=0.949, 95% CI = 0.916–0.983, p-value=0.0084)  
217 (Data not shown).

### 218 **Additional analysis**

219 Our findings further motivated us to explore the triangulation relationship between the traits shown to be  
220 related to PD using MR approach. We observed a bidirectional causal relationship between T2D and FG  
221 as well as T2D and WHR (**Figure 2**) (Data not shown). We further observed WHR as a risk factor for a  
222 higher FG with the absence of any effect of FG on WHR (**Figure 2**).

### 223 **Discussion**

224 The present study using a bi-directional MR aimed to understand the role of glycemic and anthropometric  
225 on PD, and observed that PD patients showed higher glucose tolerance, strong protective effect against  
226 T2D. Furthermore, an increase in WHR showed protection against PD; the observed effect is mediated  
227 via BMI.

228 The results observed in our present study provided further evidence regarding the role of glucose  
229 metabolism in PD, and data obtained herein is in agreement with the previously published  
230 epidemiological studies. For example, a recent study reported significantly higher blood glucose at T90 (p  
231 = 0.04) and T150 (p = 0.01) in 50 non-diabetic PD patients compared to 50 healthy controls during a 75g

232 oral glucose tolerance test, with no significant increase in insulin levels<sup>43</sup>. The study also reported that  
233 higher blood glucose levels were associated with higher BMI ( $p < 0.0001$ ). Another recent longitudinal  
234 study identified high blood glucose as a risk marker for PD progression<sup>47</sup>. The 48 month follow-up study  
235 exploring the role of 44 clinical variables in 135 patients with early PD, identified high FG levels  
236 ( $p = 0.013$ ) and T2D ( $p = 0.033$ ), among several other factors as significant predictors of annual cognitive  
237 decline in PD. The study further observed significant differences in the baseline levels of glucose when  
238 compared to 109 healthy controls. Our results are henceforth consent with these results suggesting that  
239 PD promotes dysregulation of glucose metabolism.

240         Several cohort studies have previously explored the influence of pre-existing T2D on the  
241 predisposition to PD with contradictory results. A prospective follow-up of 147,096 predominantly  
242 Caucasian participants in the Cancer Prevention Study II Nutrition Cohort from the United States found no  
243 association of the history of diabetes with PD risk (RR 0.88; 95% CI 0.62–1.25)<sup>48</sup>. Another study that  
244 comprised two large US cohorts – the Nurses’ Health Study (121,046 women) and the Health  
245 Professionals Follow-up Study (50,833 men) – observed similar results (RR 1.04, 95% CI 0.74–1.46)<sup>49</sup>. In  
246 contrast, a follow-up study in 51,552 Finnish individuals demonstrated an increased incidence of PD  
247 among patients with T2D (HR 1.85, 95% CI 1.23–2.80)<sup>50</sup>. Most recently, a meta-analysis of four cohort  
248 studies (3284 PD cases and 32,695 diabetes cases) confirmed the finding that the onset of diabetes was a  
249 risk factor for PD (RR 1.37, 95% CI 1.21–1.55)<sup>51</sup>. However, the same study reported the absence of an  
250 association in pooled populations of five case-control studies (6487 PD cases and 1387 diabetes cases;  
251 OR 0.75, 95% CI 0.50–1.11). In summary, the findings of the association between T2D and PD have been  
252 highly heterogeneous and could be attributed to variables such as different study populations and  
253 epidemiological study designs. Our MR study further suggests that the onset of T2D has no lifetime risk  
254 in the predisposition to PD. On the other hand, we show that a genetic predisposition to PD could lower  
255 the lifetime risk to T2D by 4–5%. In conclusion, our study suggests that individuals with PD are less  
256 likely to develop T2D when compared to the general population.

257           Dopamine neurotransmission in human brain is known to modulate rewarding properties of food.  
258   Previous studies have further shown that dopamine receptors are under-expressed in obese individuals,  
259   thereby initiating a feedback loop to compensate for lower dopamine secretion<sup>52</sup>. It is however not known  
260   whether an altered dopaminergic metabolism in overweight individuals could influence the onset of PD.  
261   Numerous observational studies have previously explored the association between obesity and PD with  
262   mixed results. A recent meta-analysis of ten cohort studies with 2706 PD cases showed absence of  
263   association of BMI with PD<sup>11</sup>. In contrast, a recent nationwide health check-up data for the whole South  
264   Korean population comprising 44,205 incident cases identified risky association of abdominal obesity  
265   with PD (HR: 1.13, 95% CI: 1.10-1.16)<sup>10</sup>. In our study, we observed a risk reduction of 26.5% with every  
266   one standard deviation (SD) increase in WHR. Our results are in contrast with a previously reported  
267   protective causal association of BMI with PD, which observed a risk reduction of 18%. However, since  
268   the publication of last MR study, both exposure and outcome datasets have seen an enormous addition of  
269   new samples with increased genomic coverage. The observation of a protective role of WHR henceforth  
270   adds novelty to our results.

271           Despite our inability to stratify patients by age, our study has several strengths. We adopted a  
272   comprehensive approach that included several known markers of insulin metabolism, including FG, FI,  
273   2hrGlu, FPI, HOMA-B, HOMA-IR, HbA1c, ISI, and T2D. However, we observed that the genetic  
274   instruments for FI, HOMA-B, and HOMA-IR explained a very low amount of variance and, therefore,  
275   potential causation with PD might not be completely ruled out. Although we demonstrated a consistent  
276   reverse causal association of T2D with PD using different MR methods, we did not observe similar  
277   results with HbA1C, which is a known biomarker for prediabetes or diabetes. One of the reasons for this  
278   could be that the GWAS on HbA1c with 123,491 individuals from the general population was  
279   underpowered when compared to the GWAS on T2D that included 898,129 individuals<sup>22,23</sup>. Another  
280   important limitation of this study could be the unavailability of individual-level data, which could have  
281   enabled us to confirm the absence of pleiotropic variants by using various potential confounding variables

282 between PD and T2D. The possibility of a lack of pre-existing GWAS on some of the potential  
283 confounding variables cannot be ruled out. Lastly, we could not conduct a causal association analysis  
284 among different glyceemic traits within PD patients. Nevertheless, our study suggest importance of  
285 collection of such data in near future.

286 Despite these limitations, to the best of our knowledge, our study represents one of the most  
287 comprehensive studies, to date, that has explored the potential causal role of glyceemic and anthropometric  
288 traits on PD. An extensive sensitivity analysis demonstrated the role of PD in altered glucose metabolism  
289 independent of insulin activity. Furthermore, we showed that despite high fasting glucose levels, PD  
290 patients are protective against T2D. On the contrary, anthropometric traits mainly WHR and BMI may  
291 play a role in conferring protection against PD. We further suggest the adoption of a cautionary approach  
292 when drawing clinical interpretations from the results of the current study, because additional lines of  
293 evidence may be generated, including the potential complex relationship of anthropometric, glyceemic and  
294 PD with other unexplored traits.

## 295 **Author contributions**

| Name           | Location                                  | Role   | Contributions                                                                                                                            |
|----------------|-------------------------------------------|--------|------------------------------------------------------------------------------------------------------------------------------------------|
| Sandeep Grover | University of Tübingen, Tübingen, Germany | Author | Designed and conceptualized the study; conducted data extraction; analyzed the data; drafted the manuscript; and revised the final draft |
| Ricarda Graf   | Universität zu Lübeck, Germany            | Author | Contributed to preliminary statistical analysis                                                                                          |
| Alastair Noyce | Queen Mary University of London           | Author | Revised the final draft.                                                                                                                 |
| Manu Sharma,   | University of Tübingen, Tübingen, Germany | Author | Supervised the overall study and revised the final draft.                                                                                |

296

## 297 Acknowledgements

298 Data on PD GWAS was contributed by IPDGC team and downloaded from <https://pdgenetics.org/>. Data  
299 on glycemic traits were contributed by MAGIC investigators and downloaded from  
300 [www.magicinvestigators.org](http://www.magicinvestigators.org). Data on T2D were contributed by DIAGRAM investigators and  
301 downloaded from [www.diagram-consortium.org](http://www.diagram-consortium.org). Data on BMI, WHR, WC, HC and height were provided  
302 by GIANT consortium and downloaded from <https://portals.broadinstitute.org/collaboration/giant/>. Data  
303 on birth weight was provided by EEG consortium and downloaded from <https://egg-consortium.org/>.

## 304 References

- 305 1. Kim DS, Choi HI, Wang Y, Luo Y, Hoffer BJ, Greig NH. A New Treatment Strategy for Parkinson's  
306 Disease through the Gut-Brain Axis: The Glucagon-Like Peptide-1 Receptor Pathway. *Cell*  
307 *Transplant*. 2017;26(9):1560-1571.
- 308 2. Katout M, Zhu H, Rutsky J, et al. Effect of GLP-1 mimetics on blood pressure and relationship to  
309 weight loss and glycemia lowering: results of a systematic meta-analysis and meta-regression.  
310 *Am J Hypertens*. 2014;27(1):130-139.
- 311 3. Kuwabara T, Kagalwala MN, Onuma Y, et al. Insulin biosynthesis in neuronal progenitors derived  
312 from adult hippocampus and the olfactory bulb. *EMBO Mol Med*. 2011;3(12):742-754.
- 313 4. Hosokai Y, Nishio Y, Hirayama K, et al. Distinct patterns of regional cerebral glucose metabolism  
314 in Parkinson's disease with and without mild cognitive impairment. *Mov Disord*. 2009;24(6):854-  
315 862.
- 316 5. Firbank MJ, Yarnall AJ, Lawson RA, et al. Cerebral glucose metabolism and cognition in newly  
317 diagnosed Parkinson's disease: ICICLE-PD study. *J Neurol Neurosurg Psychiatry*. 2017;88(4):310-  
318 316.
- 319 6. Jones KT, Woods C, Zhen J, Antonio T, Carr KD, Reith ME. Effects of diet and insulin on dopamine  
320 transporter activity and expression in rat caudate-putamen, nucleus accumbens, and midbrain. *J*  
321 *Neurochem*. 2017;140(5):728-740.
- 322 7. Kleinridders A, Cai W, Cappellucci L, et al. Insulin resistance in brain alters dopamine turnover  
323 and causes behavioral disorders. *Proc Natl Acad Sci U S A*. 2015;112(11):3463-3468.
- 324 8. Wang L, Zhai YQ, Xu LL, et al. Metabolic inflammation exacerbates dopaminergic neuronal  
325 degeneration in response to acute MPTP challenge in type 2 diabetes mice. *Exp Neurol*.  
326 2014;251:22-29.
- 327 9. Pagano G, Polychronis S, Wilson H, et al. Diabetes mellitus and Parkinson disease. *Neurology*.  
328 2018;90(19):e1654-e1662.
- 329 10. Nam GE, Kim SM, Han K, et al. Metabolic syndrome and risk of Parkinson disease: A nationwide  
330 cohort study. *PLoS Med*. 2018;15(8):e1002640.
- 331 11. Wang YL, Wang YT, Li JF, Zhang YZ, Yin HL, Han B. Body Mass Index and Risk of Parkinson's  
332 Disease: A Dose-Response Meta-Analysis of Prospective Studies. *PLoS One*.  
333 2015;10(6):e0131778.
- 334 12. Wills AM, Perez A, Wang J, et al. Association Between Change in Body Mass Index, Unified  
335 Parkinson's Disease Rating Scale Scores, and Survival Among Persons With Parkinson Disease:

- 336 Secondary Analysis of Longitudinal Data From NINDS Exploratory Trials in Parkinson Disease  
337 Long-term Study 1. *JAMA Neurol.* 2016;73(3):321-328.
- 338 13. Grover S, Del Greco MF, Stein CM, Ziegler A. Mendelian Randomization. *Methods Mol Biol.*  
339 2017;1666:581-628.
- 340 14. Smith GD, Ebrahim S. 'Mendelian randomization': can genetic epidemiology contribute to  
341 understanding environmental determinants of disease? *Int J Epidemiol.* 2003;32(1):1-22.
- 342 15. Burgess S, Butterworth A, Thompson SG. Mendelian randomization analysis with multiple  
343 genetic variants using summarized data. *Genet Epidemiol.* 2013;37(7):658-665.
- 344 16. Lawlor DA, Harbord RM, Sterne JA, Timpson N, Davey Smith G. Mendelian randomization: using  
345 genes as instruments for making causal inferences in epidemiology. *Stat Med.* 2008;27(8):1133-  
346 1163.
- 347 17. Noyce AJ, Kia DA, Hemani G, et al. Estimating the causal influence of body mass index on risk of  
348 Parkinson disease: A Mendelian randomisation study. *PLoS Med.* 2017;14(6):e1002314.
- 349 18. Pulit SL, Stoneman C, Morris AP, et al. Meta-analysis of genome-wide association studies for  
350 body fat distribution in 694 649 individuals of European ancestry. *Hum Mol Genet.*  
351 2019;28(1):166-174.
- 352 19. Nalls MA, Blauwendraat C, Vallerga CL, et al. Identification of novel risk loci, causal insights, and  
353 heritable risk for Parkinson's disease: a meta-analysis of genome-wide association studies.  
354 *Lancet Neurol.* 2019;18(12):1091-1102.
- 355 20. Yengo L, Sidorenko J, Kemper KE, et al. Meta-analysis of genome-wide association studies for  
356 height and body mass index in approximately 700000 individuals of European ancestry. *Hum*  
357 *Mol Genet.* 2018;27(20):3641-3649.
- 358 21. Scott RA, Lagou V, Welch RP, et al. Large-scale association analyses identify new loci influencing  
359 glycemic traits and provide insight into the underlying biological pathways. *Nat Genet.*  
360 2012;44(9):991-1005.
- 361 22. Wheeler E, Leong A, Liu CT, et al. Impact of common genetic determinants of Hemoglobin A1c  
362 on type 2 diabetes risk and diagnosis in ancestrally diverse populations: A transethnic genome-  
363 wide meta-analysis. *PLoS Med.* 2017;14(9):e1002383.
- 364 23. Mahajan A, Taliun D, Thurner M, et al. Fine-mapping type 2 diabetes loci to single-variant  
365 resolution using high-density imputation and islet-specific epigenome maps. *Nat Genet.*  
366 2018;50(11):1505-1513.
- 367 24. Manning AK, Hivert MF, Scott RA, et al. A genome-wide approach accounting for body mass  
368 index identifies genetic variants influencing fasting glycemic traits and insulin resistance. *Nat*  
369 *Genet.* 2012;44(6):659-669.
- 370 25. Dupuis J, Langenberg C, Prokopenko I, et al. New genetic loci implicated in fasting glucose  
371 homeostasis and their impact on type 2 diabetes risk. *Nat Genet.* 2010;42(2):105-116.
- 372 26. Walford GA, Gustafsson S, Rybin D, et al. Genome-Wide Association Study of the Modified  
373 Stumvoll Insulin Sensitivity Index Identifies BCL2 and FAM19A2 as Novel Insulin Sensitivity Loci.  
374 *Diabetes.* 2016;65(10):3200-3211.
- 375 27. Strawbridge RJ, Dupuis J, Prokopenko I, et al. Genome-wide association identifies nine common  
376 variants associated with fasting proinsulin levels and provides new insights into the  
377 pathophysiology of type 2 diabetes. *Diabetes.* 2011;60(10):2624-2634.
- 378 28. Saxena R, Hivert MF, Langenberg C, et al. Genetic variation in GIPR influences the glucose and  
379 insulin responses to an oral glucose challenge. *Nat Genet.* 2010;42(2):142-148.
- 380 29. Shungin D, Winkler TW, Croteau-Chonka DC, et al. New genetic loci link adipose and insulin  
381 biology to body fat distribution. *Nature.* 2015;518(7538):187-196.
- 382 30. Horikoshi M, Beaumont RN, Day FR, et al. Genome-wide associations for birth weight and  
383 correlations with adult disease. *Nature.* 2016;538(7624):248-252.

- 384 31. Pichler I, Del Greco MF, Gogele M, et al. Serum iron levels and the risk of Parkinson disease: a  
385 Mendelian randomization study. *PLoS Med.* 2013;10(6):e1001462.
- 386 32. Lill CM, Roehr JT, McQueen MB, et al. Comprehensive research synopsis and systematic meta-  
387 analyses in Parkinson's disease genetics: The PDGene database. *PLoS Genet.*  
388 2012;8(3):e1002548.
- 389 33. Consortium GP, Auton A, Brooks LD, et al. A global reference for human genetic variation.  
390 *Nature.* 2015;526(7571):68-74.
- 391 34. Brion MJ, Shakhbazov K, Visscher PM. Calculating statistical power in Mendelian randomization  
392 studies. *Int J Epidemiol.* 2013;42(5):1497-1501.
- 393 35. Bowden J, Del Greco MF, Minelli C, et al. Improving the accuracy of two-sample summary data  
394 Mendelian randomization: moving beyond the NOME assumption. *bioRxiv.* 2017.
- 395 36. Greco MF, Minelli C, Sheehan NA, Thompson JR. Detecting pleiotropy in Mendelian  
396 randomisation studies with summary data and a continuous outcome. *Stat Med.*  
397 2015;34(21):2926-2940.
- 398 37. Bowden J, Davey Smith G, Burgess S. Mendelian randomization with invalid instruments: effect  
399 estimation and bias detection through Egger regression. *Int J Epidemiol.* 2015;44(2):512-525.
- 400 38. Rucker G, Schwarzer G, Carpenter JR, Binder H, Schumacher M. Treatment-effect estimates  
401 adjusted for small-study effects via a limit meta-analysis. *Biostatistics.* 2011;12(1):122-142.
- 402 39. Grover S, Del Greco M F, Kasten M, Klein C, Lill CM, Koenig IR. Risky behaviors and Parkinson's  
403 disease: A Mendelian randomization study in up to 1 million study participants. *bioRxiv.* 2018.
- 404 40. Bowden J, Davey Smith G, Haycock PC, Burgess S. Consistent Estimation in Mendelian  
405 Randomization with Some Invalid Instruments Using a Weighted Median Estimator. *Genet*  
406 *Epidemiol.* 2016;40(4):304-314.
- 407 41. Burgess S BJ. Integrating summarized data from multiple genetic variants in Mendelian  
408 randomization: bias and coverage properties of inverse-variance weighted methods.  
409 *arXiv:151204486* 2015.
- 410 42. Hartwig FP, Davey Smith G, Bowden J. Robust inference in summary data Mendelian  
411 randomization via the zero modal pleiotropy assumption. *Int J Epidemiol.* 2017;46(6):1985-1998.
- 412 43. Marques A, Dutheil F, Durand E, et al. Glucose dysregulation in Parkinson's disease: Too much  
413 glucose or not enough insulin? *Parkinsonism Relat Disord.* 2018;55:122-127.
- 414 44. Staley JR, Blackshaw J, Kamat MA, et al. PhenoScanner: a database of human genotype-  
415 phenotype associations. *Bioinformatics.* 2016;32(20):3207-3209.
- 416 45. Nalls MA, Pankratz N, Lill CM, et al. Large-scale meta-analysis of genome-wide association data  
417 identifies six new risk loci for Parkinson's disease. *Nat Genet.* 2014;46(9):989-993.
- 418 46. Grover S, Lill CM, Kasten M, Klein C, Del Greco MF, Konig IR. Risky behaviors and Parkinson  
419 disease: A mendelian randomization study. *Neurology.* 2019;93(15):e1412-e1424.
- 420 47. Mollenhauer B, Zimmermann J, Sixel-Doring F, et al. Baseline predictors for progression 4 years  
421 after Parkinson's disease diagnosis in the De Novo Parkinson Cohort (DeNoPa). *Mov Disord.*  
422 2019;34(1):67-77.
- 423 48. Palacios N, Gao X, McCullough ML, et al. Obesity, diabetes, and risk of Parkinson's disease. *Mov*  
424 *Disord.* 2011;26(12):2253-2259.
- 425 49. Simon KC, Chen H, Schwarzschild M, Ascherio A. Hypertension, hypercholesterolemia, diabetes,  
426 and risk of Parkinson disease. *Neurology.* 2007;69(17):1688-1695.
- 427 50. Hu G, Jousilahti P, Bidel S, Antikainen R, Tuomilehto J. Type 2 diabetes and the risk of  
428 Parkinson's disease. *Diabetes Care.* 2007;30(4):842-847.
- 429 51. Cereda E, Barichella M, Pedrolli C, et al. Diabetes and risk of Parkinson's disease: a systematic  
430 review and meta-analysis. *Diabetes Care.* 2011;34(12):2614-2623.

431 52. Wang GJ, Volkow ND, Logan J, et al. Brain dopamine and obesity. *Lancet*. 2001;357(9253):354-  
432 357.

433

#### 434 **List of figures and tables**

435 **Figure 1.** Graphical representation of causal association analysis and assessment of pleiotropy

436 **A.** Scatterplot showing causal effect estimates computed using various MR methods for the association of  
437 Parkinson disease (PD) as exposure with Fasting glucose (FG) as an outcome.

438 **B.** Funnel plot showing the extent of heterogeneity among the individual Wald ratio estimates for the  
439 association of Parkinson disease (PD) as exposure with Fasting glucose (FG) as an outcome.

440 **C.** Scatterplot showing causal effect estimates computed using various MR methods for the association of  
441 Parkinson disease (PD) as exposure with type 2 disease (T2D) as an outcome.

442 **D.** Funnel plot showing the extent of heterogeneity among the individual Wald ratio estimates for the  
443 association of Parkinson disease (PD) as exposure with type 2 disease (T2D) as an outcome.

444 **E.** Scatterplot showing causal effect estimates computed using various MR methods for the association of  
445 Parkinson disease (PD) as exposure with Waist Hip Ratio (WHR) as an outcome.

446 **F.** Funnel plot showing the extent of heterogeneity among the individual Wald ratio estimates for the  
447 association of Parkinson disease (PD) as exposure with Waist Hip Ratio (WHR) as an outcome.

448 **Figure 2.** Graphical representation of causal relationship between Parkinson's disease, glycemic and  
449 anthropometric traits. (Effect estimates of significant causal relationships have been written as red text).

450 **Table 1.** Details of the discovery GWAS datasets that explored and prioritized genetic instruments used  
451 for direct and reverse casual analysis in the present study. The direct analysis was done using Parkinson's  
452 disease (PD) as an outcome, and reverse was done using glycemic traits and modifiable anthropometric  
453 traits as an outcome.



454 **Table 2.** Causal effect estimates using different Mendelian randomization (MR) methods and  
455 heterogeneity analysis of causal effect estimates for Parkinson's disease (PD) by using various (a)  
456 glycemic traits as exposures. (b) anthropometric traits as exposures.

457 **Table 3.** Causal effect estimates using different Mendelian randomization methods and heterogeneity  
458 analysis of causal effect estimates for various (a) glycemic traits and (b) modifiable anthropometric traits  
459 by using Parkinson's disease as an exposure.

460 **Supplementary Table 1a.** Details of follow-up genetic variants in the replication and pooled exposure  
461 GWAS datasets and prioritized genetic instruments used for the secondary analysis

462 **Supplementary Table 1b.** Details of exposure GWAS datasets adjusted for BMI and prioritized genetic  
463 instruments used for the sensitivity analysis

464 **Supplementary Table 2.** Harmonized summary effect estimates from exposure and outcome datasets  
465 used for the conduct of Mendelian randomization (MR)

466 **Supplementary Table 3.** Sensitivity analysis of causal effect estimates using leave one out method (a)  
467 Parkinson's disease (PD) as exposure and fasting glucose (FG) as an outcome (b) Parkinson's disease  
468 (PD) as exposure and type 2 diabetes (T2D) as an outcome.

469 **Supplementary Table 4.** Sensitivity analysis exploring the (a) influence of GWAS study design (b) BMI  
470 adjusted traits on causal effect estimates

**Table 1.** Details of discovery GWAS datasets explored and prioritized instruments used for direct and reverse causal analysis in the present study. Direct analysis was done using PD as an outcome and reverse was done using glycemic traits and modifiable anthropometric traits as outcome.

| S.No.                        | Phenotype                                                       | Source study                           | Maximum sample size         | P                  | # of SNPs analyzed | # of significant SNPs | # of significant SNPs (post-clumping) ( $R^2 < 0.001$ ) | # of proxy SNPs | # of SNPs in the genetic instrument | Average F-statistics (Median (Range)) | $R^2$ (%) |
|------------------------------|-----------------------------------------------------------------|----------------------------------------|-----------------------------|--------------------|--------------------|-----------------------|---------------------------------------------------------|-----------------|-------------------------------------|---------------------------------------|-----------|
| <b>Glycemic traits</b>       |                                                                 |                                        |                             |                    |                    |                       |                                                         |                 |                                     |                                       |           |
| 1                            | 2 hour glucose (2hGlu)                                          | Saxena et al. 2010, Scott et al. 2012* | 15234, 42854                | $5 \times 10^{-8}$ | 2401708            | NA                    | 4                                                       | 0               | 3                                   | 48.9 (44.8-67.4)                      | 1.05      |
| 2                            | Fasting glucose (FG)                                            | Manning et al. 2012                    | 58074                       | $5 \times 10^{-8}$ | 2628879            | 505                   | 22                                                      | 0               | 22                                  | 41.8 (29.8-455.9)                     | 4.80      |
| 3                            | Fasting insulin (FI)                                            | Manning et al. 2012                    | 51750                       | $5 \times 10^{-8}$ | 2627848            | 34                    | 4                                                       | 0               | 4                                   | 35.6 (32.7-40.2)                      | 1.20      |
| 4                            | Fasting proinsulin (FPI)                                        | Strawbridge et al. 2011                | 10701                       | $5 \times 10^{-8}$ | 2496073            | 407                   | 8                                                       | 0               | 8                                   | 53.7 (31.7-189)                       | 1.92      |
| 5                            | Hemoglobin A1c (HbA1c)                                          | Wheeler et al. 2017                    | 123491                      | $5 \times 10^{-8}$ | 2586698            | 821                   | 38                                                      | 0               | 38                                  | 46.7 (28.7-288)                       | 0.48      |
| 6                            | Homeostasis model assessment of $\beta$ -cell function (HOMA-B) | Dupuis et al. 2010                     | 36466                       | $5 \times 10^{-8}$ | 2456945            | 119                   | 4                                                       | 0               | 4                                   | 69.8 (33.4-123)                       | 0.17      |
| 7                            | Homeostasis model assessment of insulin resistance (HOMA-IR)    | Dupuis et al. 2010                     | 37037                       | $5 \times 10^{-8}$ | 2458073            | 0                     | NA                                                      | NA              | NA                                  | NA                                    | NA        |
| 8                            | Modified stumvoll insulin sensitivity index (ISI)               | Walford et al. 2016                    | 16753                       | $5 \times 10^{-8}$ | 2423410            | 0                     | NA                                                      | NA              | NA                                  | NA                                    | NA        |
| 9                            | Type 2 Diabetes (T2D)                                           | Mahajan et al. 2018                    | 74123 cases/824006 controls | $5 \times 10^{-8}$ | 23465132           | 19227                 | 202                                                     | NA              | 202                                 | 47.6 (29.2-2018)                      | NA        |
| <b>Anthropometric traits</b> |                                                                 |                                        |                             |                    |                    |                       |                                                         |                 |                                     |                                       |           |
| 1                            | Body mass index (BMI)                                           | Pulit et al. 2019                      | 694649                      | $5 \times 10^{-8}$ | 27381302           | 85104                 | 548                                                     | 2               | 548                                 | 49.0 (28.4-2030.6)                    | 5.77      |
| 2                            | Waist hip ratio (WHR)                                           | Pulit et al. 2019                      | 694649                      | $5 \times 10^{-8}$ | 27376273           | 39705                 | 358                                                     | 2               | 357                                 | 44.0 (29.0-820.0)                     | 3.28      |

|                      |                          |                       |                             |                    |                |        |     |      |       |                       |      |
|----------------------|--------------------------|-----------------------|-----------------------------|--------------------|----------------|--------|-----|------|-------|-----------------------|------|
| 3                    | Waist circumference (WC) | Shungin et al. 2015   | 210088                      | $5 \times 10^{-8}$ | 2565407        | 1105   | 42  | 0    | 42    | 38.1<br>(29.3-447.0)  | 1.18 |
| 4                    | Hip circumference (HC)   | Shungin et al. 2015   | 210088                      | $5 \times 10^{-8}$ | 2559738        | 1238   | 52  | 0    | 52    | 39.4<br>(27.8-378.1)  | 1.36 |
| 5                    | Adult height (AH)        | Yengo et al. 2018     | 693529                      | $5 \times 10^{-8}$ | 2334001        | 130933 | 832 | 0    | 831   | 92.2<br>(28.4-2209.0) | 24.6 |
| 6                    | Birth weight (BW)        | Horikoshi et al. 2016 | 153781                      | $5 \times 10^{-8}$ | 16245523       | 2278   | 50  | 3    | 49    | 36.9<br>(30.4-179.8)  | 2.00 |
| <b>Disease trait</b> |                          |                       |                             |                    |                |        |     |      |       |                       |      |
| 1                    | Parkinson's disease (PD) | Nalls et al. 2019     | 33,674<br>cases,<br>449056* | $5 \times 10^{-8}$ | 175,137,7<br>3 | 3465   | 23  | 0-11 | 18-23 | 43.6<br>(30.0-181.5)  | NA   |

\*Discovery cohort (Saxena et al. 2010) was used to identify the SNPs, while effect estimates were taken from pooled cohort (Scott et al. 2012).

\*\* The significant SNPs were identified from the Nalls et al. 2014 but the effect estimates were derived from a sub-population (without 23andMe cohort). Two SNPs were not available in the available GWAS dataset.

**Table 2a.** Causal effect estimates using different Mendelian randomization methods and heterogeneity analysis of causal effect estimates for Parkinson' disease using various glycemc traits as exposures.

| Trait*                   | MR methodology                                | # of SNPs | Direct causal effect estimates |               |        | Tests of heterogeneity                                                     |                  |
|--------------------------|-----------------------------------------------|-----------|--------------------------------|---------------|--------|----------------------------------------------------------------------------|------------------|
|                          |                                               |           | OR                             | 95% CI        | p      |                                                                            |                  |
| 2 hour glucose (2hGlu)   | Inverse variance weighted (2nd order weights) | 3         | 0.9260                         | 0.563-1.523   | 0.5749 | MR-Egger intecept (p-value)                                                | 0.8253           |
|                          | MR Egger                                      |           | 0.7160                         | nd            | 0.7786 | I square (IVW)                                                             | 0.0%             |
|                          | Weighted median method                        |           | 0.8930                         | 0.786-1.016   | 0.4738 | Cochrane Q-test (IVW) (p-value)                                            | 0.7984           |
|                          | Weighted mode method (NOME assumptions)       |           | 0.8850                         | 0.650-1.204   | 0.5173 | Rucker's Q-test (p-value)<br>Rucker's test statistic/ Cochrane Q-statistic | 0.5427<br>0.8229 |
| Fasting glucose (FG)     | Inverse variance weighted (2nd order weights) | 22        | 1.1810                         | 0.858-1.624   | 0.2910 | MR-Egger intecept (p-value)                                                | 0.5647           |
|                          | MR Egger                                      |           | 1.0000                         | 0.510-1.963   | 0.9992 | I square (IVW)                                                             | 29.4%            |
|                          | Weighted median method                        |           | 1.1390                         | 0.952-1.363   | 0.4758 | Cochrane Q-test (IVW) (p-value)                                            | 0.0970           |
|                          | Weighted mode method (NOME assumptions)       |           | 1.0520                         | 0.752-1.473   | 0.7706 | Rucker's Q-test (p-value)<br>Rucker's test statistic/ Cochrane Q-statistic | 0.0834<br>0.9823 |
| Fasting insulin (FI)     | Inverse variance weighted (2nd order weights) | 4         | 2.4399                         | 0.053-112.905 | 0.5128 | MR-Egger intecept (p-value)                                                | 0.1768           |
|                          | MR Egger                                      |           | nd                             | nd            | 0.2085 | I square (IVW)                                                             | 79.0%            |
|                          | Weighted median method                        |           | 1.7492                         | 0.895-3.417   | 0.1867 | Cochrane Q-test (IVW) (p-value)                                            | 0.0025           |
|                          | Weighted mode method (NOME assumptions)       |           | 1.4995                         | 0.155-14.481  | 0.2864 | Rucker's Q-test (p-value)<br>Rucker's test statistic/ Cochrane Q-statistic | 0.0637<br>0.3851 |
| Fasting proinsulin (FPI) | Inverse variance weighted (2nd order weights) | 8         | 1.0200                         | 0.811-1.283   | 0.8437 | MR-Egger intecept (p-value)                                                | 0.1311           |
|                          | MR Egger                                      |           | 0.7356                         | 0.445-1.218   | 0.1865 | I square (IVW)                                                             | 16.7%            |
|                          | Weighted median method                        |           | 0.8703                         | 0.775-0.978   | 0.2710 | Cochrane Q-test (IVW) (p-value)                                            | 0.2984           |
|                          | Weighted mode method (NOME assumptions)       |           | 0.9213                         | 0.706-0.202   | 0.5641 | Rucker's Q-test (p-value)                                                  | 0.4654           |

|                                                                 |                                               |     |        |               |        |                                               |         |
|-----------------------------------------------------------------|-----------------------------------------------|-----|--------|---------------|--------|-----------------------------------------------|---------|
|                                                                 |                                               |     |        |               |        | Rucker's test statistic/ Cochrane Q-statistic | 0.6705  |
| Hemoglobin A1c (HbA1c)                                          | Inverse variance weighted (2nd order weights) | 38  | 0.9441 | 0.625-1.500   | 0.8005 | MR-Egger intercept (p-value)                  | 0.1183  |
|                                                                 | MR Egger                                      |     | 1.7000 | 0.712-4.056   | 0.2242 | I square (IVW)                                | 24.4%   |
|                                                                 | Weighted median method                        |     | 1.1540 | 0.879-1.517   | 0.6022 | Cochrane Q-test (IVW) (p-value)               | 0.0905  |
|                                                                 | Weighted mode method (NOME assumptions)       |     | 1.1920 | 0.686-2.070   | 0.5368 | Rucker's Q-test (p-value)                     | 0.1206  |
|                                                                 |                                               |     |        |               |        | Rucker's test statistic/ Cochrane Q-statistic | 0.9422  |
| Homeostasis model assessment of $\beta$ -cell function (HOMA-B) | Inverse variance weighted (2nd order weights) | 4   | 1.0250 | 0.397-2.645   | 0.9392 | MR-Egger intercept (p-value)                  | 0.7166  |
|                                                                 | MR Egger                                      |     | 0.6348 | 0.004-103.727 | 0.7382 | I square (IVW)                                | 0.0%    |
|                                                                 | Weighted median method                        |     | 1.1970 | 0.853-1.680   | 0.6328 | Cochrane Q-test (IVW) (p-value)               | 0.8413  |
|                                                                 | Weighted mode method (NOME assumptions)       |     | 1.2447 | 0.514-3.011   | 0.6605 | Rucker's Q-test (p-value)                     | 0.7187  |
|                                                                 |                                               |     |        |               |        | Rucker's test statistic/ Cochrane Q-statistic | 0.7921  |
| Type 2 Diabetes (T2D)                                           | Inverse variance weighted (2nd order weights) | 202 | 1.0333 | 0.974-1.093   | 0.2780 | MR-Egger intercept (p-value)                  | 0.9723  |
|                                                                 | MR Egger                                      |     | 1.0300 | 0.911-1.165   | 0.6330 | I square (IVW)                                | 31.5%   |
|                                                                 | Weighted median method                        |     | 1.0010 | 0.963-1.042   | 0.9700 | Cochrane Q-test (IVW) (p-value)               | <0.0001 |
|                                                                 | Weighted mode method (NOME assumptions)       |     | 1.0140 | 0.928-1.109   | 0.7580 | Rucker's Q-test (p-value)                     | <0.0001 |
|                                                                 |                                               |     |        |               |        | Rucker's test statistic/ Cochrane Q-statistic | 1.0000  |

nd: Not defined

\*No significant SNPs were identified for Homeostasis model assessment of insulin resistance (HOMA-IR) and Modified stumvoll insulin sensitivity index (ISI).

**Table 2b.** Causal effect estimates using different Mendelian randomization methods and heterogeneity analysis of causal effect estimates for Parkinson' disease using various anthropometric traits as exposures.

| Trait*                   | MR methodology                                | Number of SNPs | Direct causal effect estimates |             |                                               | Tests of heterogeneity          |         |
|--------------------------|-----------------------------------------------|----------------|--------------------------------|-------------|-----------------------------------------------|---------------------------------|---------|
|                          |                                               |                | OR                             | 95% CI      | p                                             |                                 |         |
| Body mass index (BMI)    | Inverse variance weighted (2nd order weights) | 548            | 0.920                          | 0.802-1.054 | 0.2418                                        | MR-Egger intercept (p-value)    | 0.3961  |
|                          | MR Egger                                      |                | 0.807                          | 0.579-1.125 | 0.2046                                        | I square (IVW)                  | 25.9%   |
|                          | Weighted median method                        |                | 0.957                          | 0.856-1.069 | 0.6906                                        | Cochrane Q-test (IVW) (p-value) | <0.0001 |
|                          | Weighted mode method (NOME assumptions)       |                | 1.002                          | 0.756-1.329 | 0.9875                                        | Rucker's Q-test (p-value)       | <0.0001 |
|                          |                                               |                |                                |             | Rucker's test statistic/ Cochrane Q-statistic | 0.9988                          |         |
| Waist hip ratio (WHR)    | Inverse variance weighted (2nd order weights) | 357            | 0.735                          | 0.622-0.868 | 0.0003                                        | MR-Egger intercept (p-value)    | 0.1508  |
|                          | MR Egger                                      |                | 1.012                          | 0.635-1.614 | 0.9602                                        | I square (IVW)                  | 22.0%   |
|                          | Weighted median method                        |                | 0.810                          | 0.721-0.911 | 0.0737                                        | Cochrane Q-test (IVW) (p-value) | 0.0003  |
|                          | Weighted mode method (NOME assumptions)       |                | 0.872                          | 0.580-1.311 | 0.5098                                        | Rucker's Q-test (p-value)       | 0.0003  |
|                          |                                               |                |                                |             | Rucker's test statistic/ Cochrane Q-statistic | 0.9947                          |         |
| Waist circumference (WC) | Inverse variance weighted (2nd order weights) | 42             | 0.890                          | 0.678-1.169 | 0.3965                                        | MR-Egger intercept (p-value)    | 0.8559  |
|                          | MR Egger                                      |                | 0.946                          | 0.461-1.943 | 0.8770                                        | I square (IVW)                  | 29.9%   |
|                          | Weighted median method                        |                | 0.944                          | 0.797-1.118 | 0.7361                                        | Cochrane Q-test (IVW) (p-value) | 0.0378  |
|                          | Weighted mode method (NOME assumptions)       |                | 0.985                          | 0.695-1.396 | 0.9318                                        | Rucker's Q-test (p-value)       | 0.0289  |
|                          |                                               |                |                                |             | Rucker's test statistic/ Cochrane Q-statistic | 1.0030                          |         |
| Hip circumference (HC)   | Inverse variance weighted (2nd order weights) | 52             | 0.904                          | 0.719-1.136 | 0.3776                                        | MR-Egger intercept (p-value)    | 0.7351  |
|                          | MR Egger                                      |                | 0.987                          | 0.471-2.069 | 0.9727                                        | I square (IVW)                  | 34.2%   |
|                          | Weighted median method                        |                | 0.952                          | 0.823-1.102 | 0.7402                                        | Cochrane Q-test (IVW) (p-value) | 0.0097  |

|                   |                                               |     |       |             |        |                                                                            |                  |
|-------------------|-----------------------------------------------|-----|-------|-------------|--------|----------------------------------------------------------------------------|------------------|
|                   | Weighted mode method (NOME assumptions)       |     | 1.009 | 0.715-1.424 | 0.9581 | Rucker's Q-test (p-value)<br>Cochrane Q-staitics/Rucker's test statistic   | 0.0072<br>1.0029 |
| Adult height (AH) | Inverse variance weighted (2nd order weights) | 49  | 1.024 | 0.952-1.101 | 0.5237 | MR-Egger intecept (p-value)                                                | 0.9183           |
|                   | MR Egger                                      |     | 1.031 | 0.885-1.201 | 0.6974 | I square (IVW)                                                             | 19.4%            |
|                   | Weighted median method                        |     | 0.965 | 0.911-1.021 | 0.5302 | Cochrane Q-test (IVW) (p-value)                                            | 0.0000           |
|                   | Weighted mode method (NOME assumptions)       |     | 0.883 | 0.721-1.082 | 0.2302 | Rucker's Q-test (p-value)<br>Rucker's test statistic/ Cochrane Q-statistic | 0.0000<br>1.0000 |
| Birth weight (BW) | Inverse variance weighted (2nd order weights) | 831 | 1.198 | 0.926-1.549 | 0.1643 | MR-Egger intecept (p-value)                                                | 0.3284           |
|                   | MR Egger                                      |     | 1.779 | 0.784-4.040 | 0.1641 | I square (IVW)                                                             | 38.0%            |
|                   | Weighted median method                        |     | 1.291 | 1.100-1.514 | 0.1164 | Cochrane Q-test (IVW) (p-value)                                            | 0.0045           |
|                   | Weighted mode method (NOME assumptions)       |     | 1.518 | 0.919-2.507 | 0.1093 | Rucker's Q-test (p-value)<br>Rucker's test statistic/ Cochrane Q-statistic | 0.0052<br>0.9759 |

\*No significant SNPs were identified for Homeostasis model assessment of insulin resistance (HOMA-IR) and Modified stumvoll insulin sensitivity index (ISI).

**Table 3a.** Causal effect estimates using different Mendelian randomization methods and heterogeneity analysis of causal effect estimates for various glyceimic traits using Parkinson's disease as an exposure.

| Trait*                   | MR methodology                                | # of SNPs | Reverse causal effect estimate |                |        | Tests of heterogeneity                                                     |                  |
|--------------------------|-----------------------------------------------|-----------|--------------------------------|----------------|--------|----------------------------------------------------------------------------|------------------|
|                          |                                               |           | $\beta$ or OR**                | 95% CI         | p      |                                                                            |                  |
| Fasting glucose (FG)     | Inverse variance weighted (2nd order weights) | 19        | 0.0188                         | 0.0062-0.0313  | 0.0055 | MR-Egger intecept (p-value)                                                | 0.0957           |
|                          | MR Egger                                      |           | 0.0422                         | 0.0117-0.0728  | 0.0097 | I square (IVW)                                                             | 0.0%             |
|                          | Weighted median method                        |           | 0.0150                         | 0.0071-0.0228  | 0.0710 | Cochrane Q-test (IVW) (p-value)                                            | 0.4555           |
|                          | Weighted mode method (NOME assumptions)       |           | 0.0161                         | -0.0046-0.0368 | 0.1454 | Rucker's Q-test (p-value)<br>Rucker's test statistic/ Cochrane Q-statistic | 0.5934<br>0.8349 |
| Fasting insulin (FI)     | Inverse variance weighted (2nd order weights) | 19        | 0.0099                         | -0.0059-0.0258 | 0.2035 | MR-Egger intecept (p-value)                                                | 0.1686           |
|                          | MR Egger                                      |           | 0.0325                         | -0.0039-0.0690 | 0.0775 | I square (IVW)                                                             | 35.7%            |
|                          | Weighted median method                        |           | 0.0122                         | 0.0041- 0.0203 | 0.1423 | Cochrane Q-test (IVW) (p-value)                                            | 0.0621           |
|                          | Weighted mode method (NOME assumptions)       |           | 0.0190                         | 0.0014-0.0366  | 0.0404 | Rucker's Q-test (p-value)<br>Rucker's test statistic/ Cochrane Q-statistic | 0.1102<br>0.8698 |
| Fasting proinsulin (FPI) | Inverse variance weighted (2nd order weights) | 19        | 0.0230                         | -0.0106-0.0566 | 0.1672 | MR-Egger intecept (p-value)                                                | 0.5022           |
|                          | MR Egger                                      |           | 0.0503                         | -0.0408-0.1416 | 0.2590 | I square (IVW)                                                             | 30.7%            |
|                          | Weighted median method                        |           | 0.0276                         | 0.0079-0.0472  | 0.1770 | Cochrane Q-test (IVW) (p-value)                                            | 0.1062           |
|                          | Weighted mode method (NOME assumptions)       |           | 0.0138                         | -0.0689-0.0967 | 0.7456 | Rucker's Q-test (p-value)<br>Rucker's test statistic/ Cochrane Q-statistic | 0.0946<br>0.9698 |
| Hemoglobin A1c (HbA1c)   | Inverse variance weighted (2nd order weights) | 19        | 0.0005                         | -0.0086-0.0096 | 0.9059 | MR-Egger intecept (p-value)                                                | 0.4788           |
|                          | MR Egger                                      |           | 0.0082                         | -0.0160-0.0325 | 0.4846 | I square (IVW)                                                             | 37.8%            |
|                          | Weighted median method                        |           | 0.0023                         | -0.0024-0.0071 | 0.6483 | Cochrane Q-test (IVW) (p-value)                                            | 0.0492           |



|                                                                 |                                               |    |         |                 |        |                                                                            |                   |
|-----------------------------------------------------------------|-----------------------------------------------|----|---------|-----------------|--------|----------------------------------------------------------------------------|-------------------|
|                                                                 | Weighted mode method (NOME assumptions)       |    | 0.0016  | -0.0118-0.0151  | 0.8094 | Rucker's Q-test (p-value)<br>Rucker's test statistic/ Cochrane Q-statistic | 0.0416<br>0.9782  |
| Homeostasis model assessment of insulin resistance (HOMA-IR)    | Inverse variance weighted (2nd order weights) | 19 | 0.0086  | -0.0081-0.0254  | 0.2917 | MR-Egger intercept (p-value)                                               | 0.1701            |
|                                                                 | MR Egger                                      |    | 0.0335  | -0.0066-0.0738  | 0.0960 | I square (IVW)                                                             | 15.7%             |
|                                                                 | Weighted median method                        |    | 0.0142  | 0.0040-0.0244   | 0.2279 | Cochrane Q-test (IVW) (p-value)                                            | 0.2654            |
|                                                                 | Weighted mode method (NOME assumptions)       |    | 0.0262  | -0.0072- 0.0598 | 0.1429 | Rucker's Q-test (p-value)<br>Rucker's test statistic/ Cochrane Q-statistic | 0.3390<br>0.8796  |
| Homeostasis model assessment of $\beta$ -cell function (HOMA-B) | Inverse variance weighted (2nd order weights) | 18 | -0.0035 | -0.0159-0.0088  | 0.5530 | MR-Egger intercept (p-value)                                               | 0.2189            |
|                                                                 | MR Egger                                      |    | 0.0122  | -0.0167-0.0413  | 0.3827 | I square (IVW)                                                             | 0.0%              |
|                                                                 | Weighted median method                        |    | 0.0034  | -0.0046-0.0115  | 0.6900 | Cochrane Q-test (IVW) (p-value)                                            | 0.7384            |
|                                                                 | Weighted mode method (NOME assumptions)       |    | 0.0093  | -0.0120-0.0308  | 0.4035 | Rucker's Q-test (p-value)<br>Rucker's test statistic/ Cochrane Q-statistic | 0.7860<br>0.8770  |
| Modified stumvoll insulin sensitivity index (ISI)               | Inverse variance weighted (2nd order weights) | 18 | -0.0491 | -0.1062-0.0078  | 0.0866 | MR-Egger intercept (p-value)                                               | 0.4443            |
|                                                                 | MR Egger                                      |    | -0.0915 | -0.2200-0.0368  | 0.1501 | I square (IVW)                                                             | 43.6%             |
|                                                                 | Weighted median method                        |    | -0.0228 | -0.0511-0.0055  | 0.4516 | Cochrane Q-test (IVW) (p-value)                                            | 0.0252            |
|                                                                 | Weighted mode method (NOME assumptions)       |    | -0.0260 | -0.0996- 0.0475 | 0.5017 | Rucker's Q-test (p-value)<br>Rucker's test statistic/ Cochrane Q-statistic | 0.0238<br>0.9622  |
| Type 2 Diabetes (T2D)                                           | Inverse variance weighted (2nd order weights) | 23 | 0.9735  | 0.9211-1.029    | 0.3258 | MR-Egger intercept (p-value)                                               | 0.4711            |
|                                                                 | MR Egger                                      |    | 1.0180  | 0.886-1.170     | 0.7901 | I square (IVW)                                                             | 76.9%             |
|                                                                 | Weighted median method                        |    | 0.9460  | 0.929-0.963     | 0.0051 | Cochrane Q-test (IVW) (p-value)                                            | <0.0001           |
|                                                                 | Weighted mode method (NOME assumptions)       |    | 0.9430  | 0.904-0.983     | 0.0116 | Rucker's Q-test (p-value)<br>Rucker's test statistic/ Cochrane Q-statistic | <0.0001<br>0.9685 |

\*Discovery cohort for 2 hour glucose (2hGlu) was not available.

\*\*OR is for T2D;  $\beta$  is for other outcome variables

**Table 3b.** Causal effect estimates using different Mendelian randomization methods and heterogeneity analysis of causal effect estimates for various modifiable anthropometric traits using Parkinson's disease as an exposure.

| Trait*                   | MR methodology                                | Number of SNPs | Reverse causal effect estimate |                 |        | Tests of heterogeneity                                                     |                   |
|--------------------------|-----------------------------------------------|----------------|--------------------------------|-----------------|--------|----------------------------------------------------------------------------|-------------------|
|                          |                                               |                | $\beta$                        | 95% CI          | p      |                                                                            |                   |
| Body mass index (BMI)    | Inverse variance weighted (2nd order weights) | 23             | -0.005434556                   | -0.0242-0.0133  | 0.5538 | MR-Egger intercept (p-value)                                               | 0.4102            |
|                          | MR Egger                                      |                | 0.0129                         | -0.0362-0.0620  | 0.5910 | I square (IVW)                                                             | 84.6%             |
|                          | Weighted median method                        |                | -0.0102                        | -0.0157--0.0046 | 0.0786 | Cochrane Q-test (IVW) (p-value)                                            | <0.0001           |
|                          | Weighted mode method (NOME assumptions)       |                | -0.0144                        | -0.0269--0.0019 | 0.0344 | Rucker's Q-test (p-value)<br>Rucker's test statistic/ Cochrane Q-statistic | <0.0001<br>1.0006 |
| Waist hip ratio (WHR)    | Inverse variance weighted (2nd order weights) | 23             | -0.0077                        | -0.0277-0.0122  | 0.4288 | MR-Egger intercept (p-value)                                               | 0.8462            |
|                          | MR Egger                                      |                | -0.0031                        | -0.0562-0.0500  | 0.9035 | I square (IVW)                                                             | 84.1%             |
|                          | Weighted median method                        |                | -0.0019                        | -0.0073-0.0034  | 0.7276 | Cochrane Q-test (IVW) (p-value)                                            | <0.0001           |
|                          | Weighted mode method (NOME assumptions)       |                | -0.0056                        | -0.0246-0.0133  | 0.5644 | Rucker's Q-test (p-value)<br>Rucker's test statistic/ Cochrane Q-statistic | <0.0001<br>1.0170 |
| Waist circumference (WC) | Inverse variance weighted (2nd order weights) | 19             | -0.0034                        | -0.0277-0.0208  | 0.7691 | MR-Egger intercept (p-value)                                               | 0.6691            |
|                          | MR Egger                                      |                | 0.0084                         | -0.0543-0.0712  | 0.7801 | I square (IVW)                                                             | 51.0%             |
|                          | Weighted median method                        |                | -0.0100                        | -0.0214-0.0012  | 0.3863 | Cochrane Q-test (IVW) (p-value)                                            | 0.0057            |
|                          | Weighted mode method (NOME assumptions)       |                | -0.0128                        | -0.0391-0.0135  | 0.3528 | Rucker's Q-test (p-value)<br>Rucker's test statistic/ Cochrane Q-statistic | 0.0038<br>0.9960  |

|                        |                                               |    |        |                |        |                                               |        |
|------------------------|-----------------------------------------------|----|--------|----------------|--------|-----------------------------------------------|--------|
| Hip circumference (HC) | Inverse variance weighted (2nd order weights) | 19 | 0.0005 | -0.0216-0.0227 | 0.9609 | MR-Egger intercept (p-value)                  | 0.343  |
|                        | MR Egger                                      |    | 0.0246 | -0.0320-0.0812 | 0.3724 | I square (IVW)                                | 39.1%  |
|                        | Weighted median method                        |    | 0.0090 | -0.0019-0.0201 | 0.4195 | Cochrane Q-test (IVW) (p-value)               | 0.0419 |
|                        | Weighted mode method (NOME assumptions)       |    | 0.0162 | -0.0118-0.0442 | 0.2715 | Rucker's Q-test (p-value)                     | 0.0408 |
|                        |                                               |    |        |                |        | Rucker's test statistic/ Cochrane Q-statistic | 0.9598 |

**A**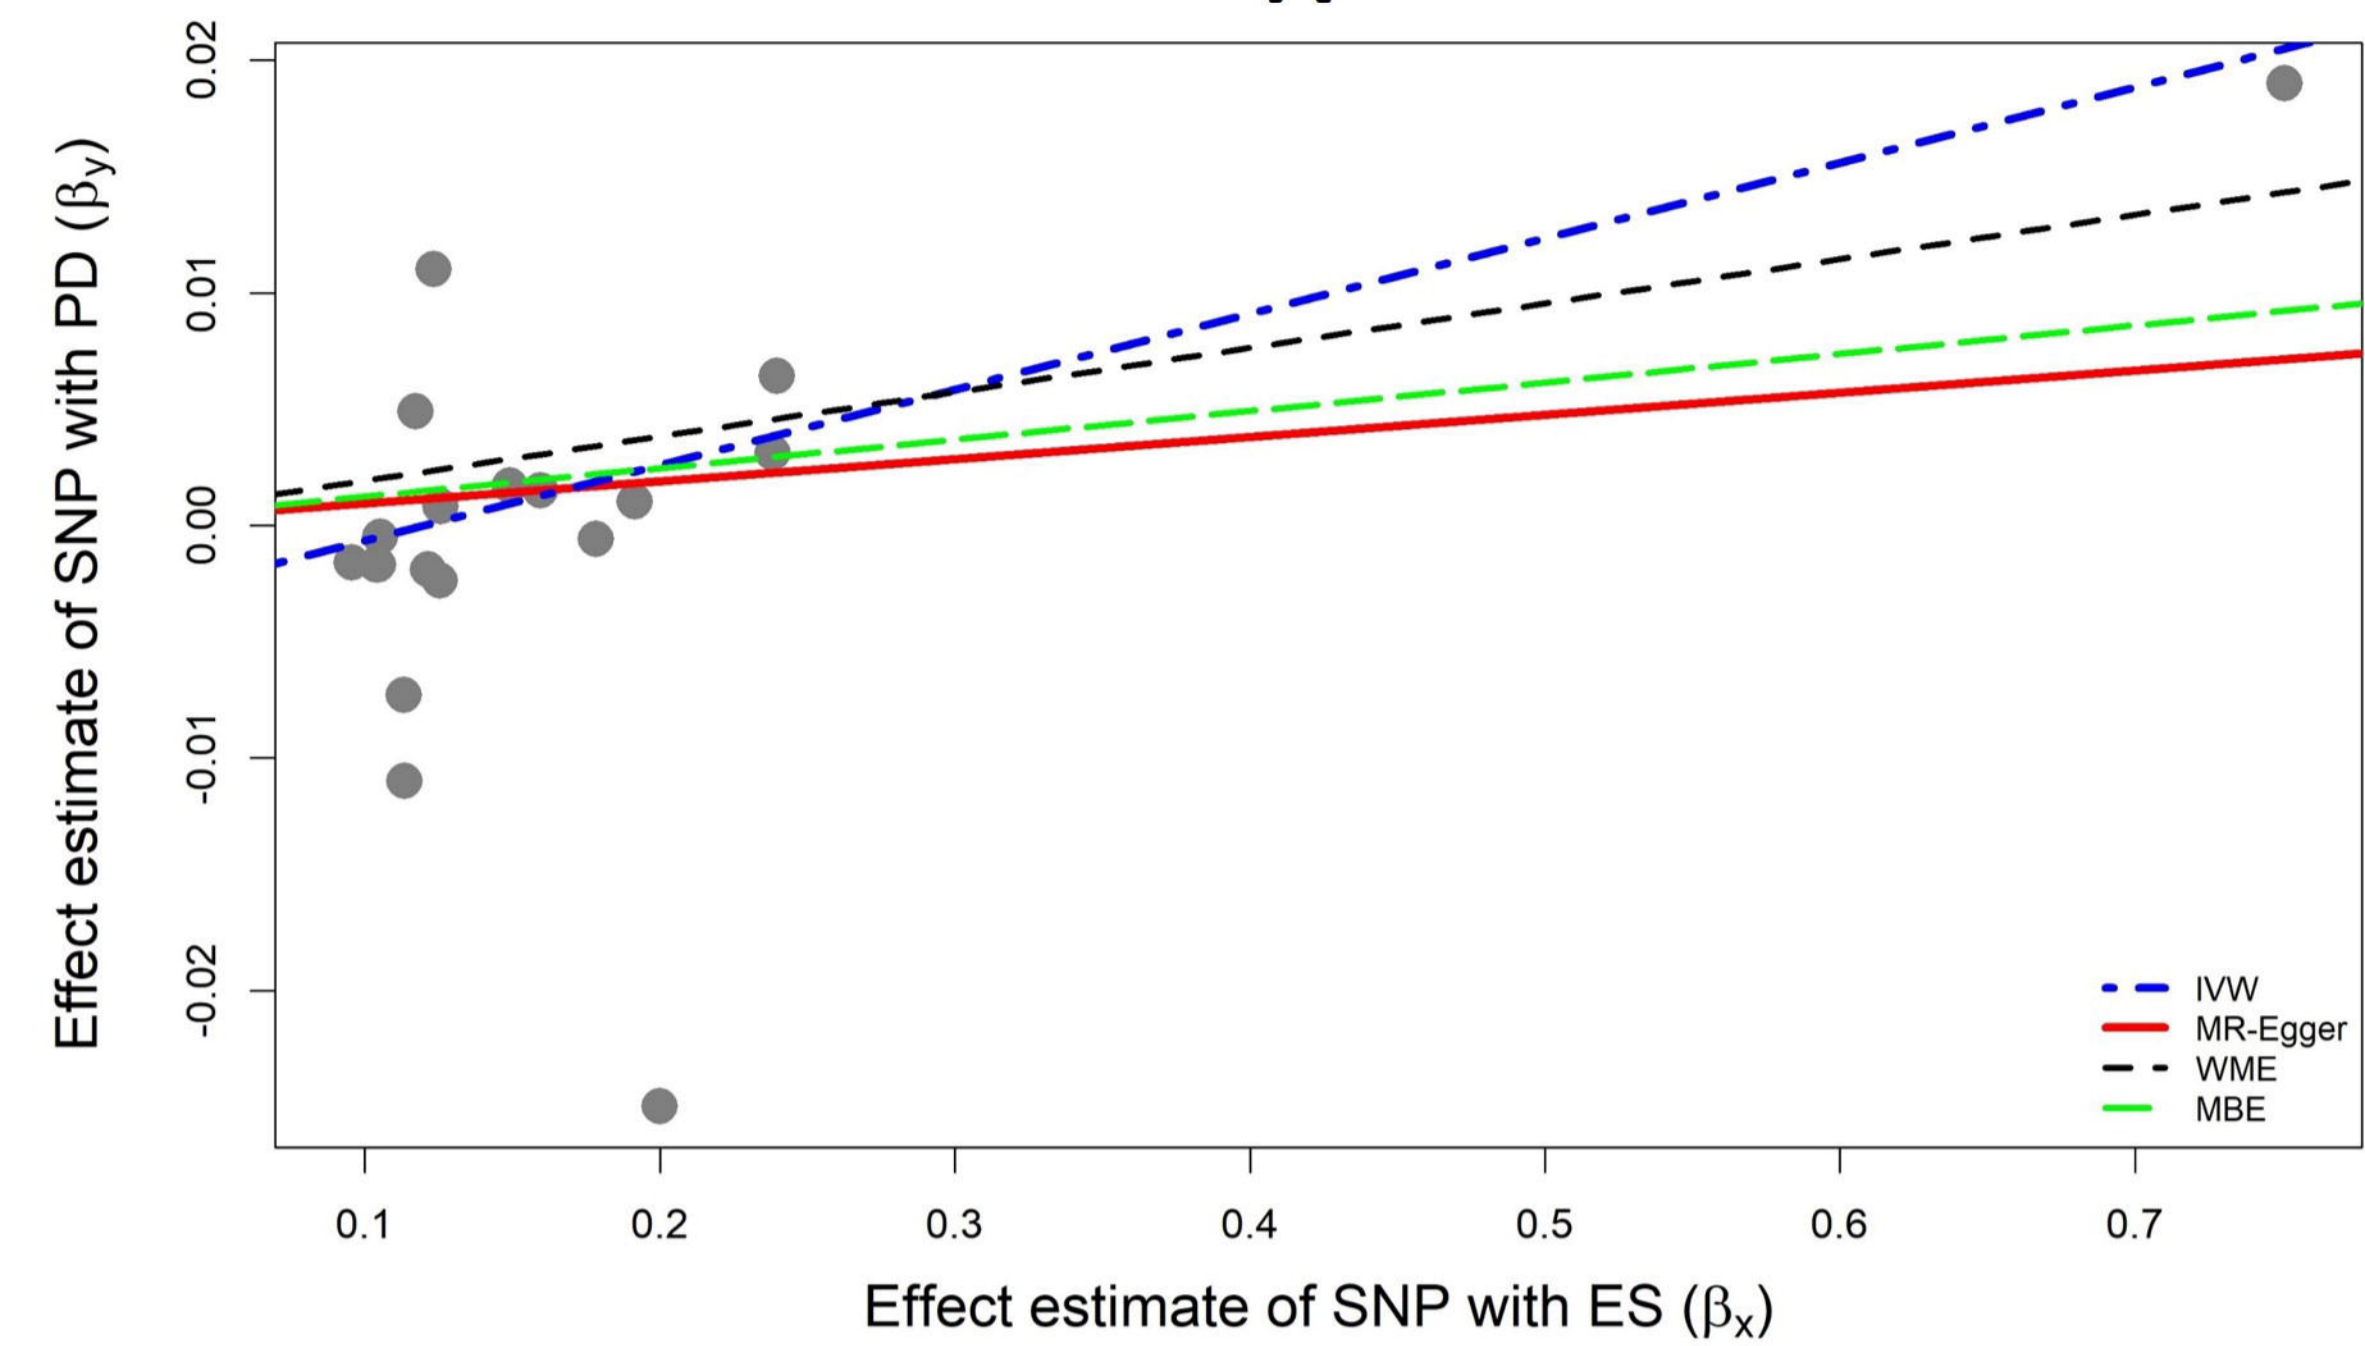**B**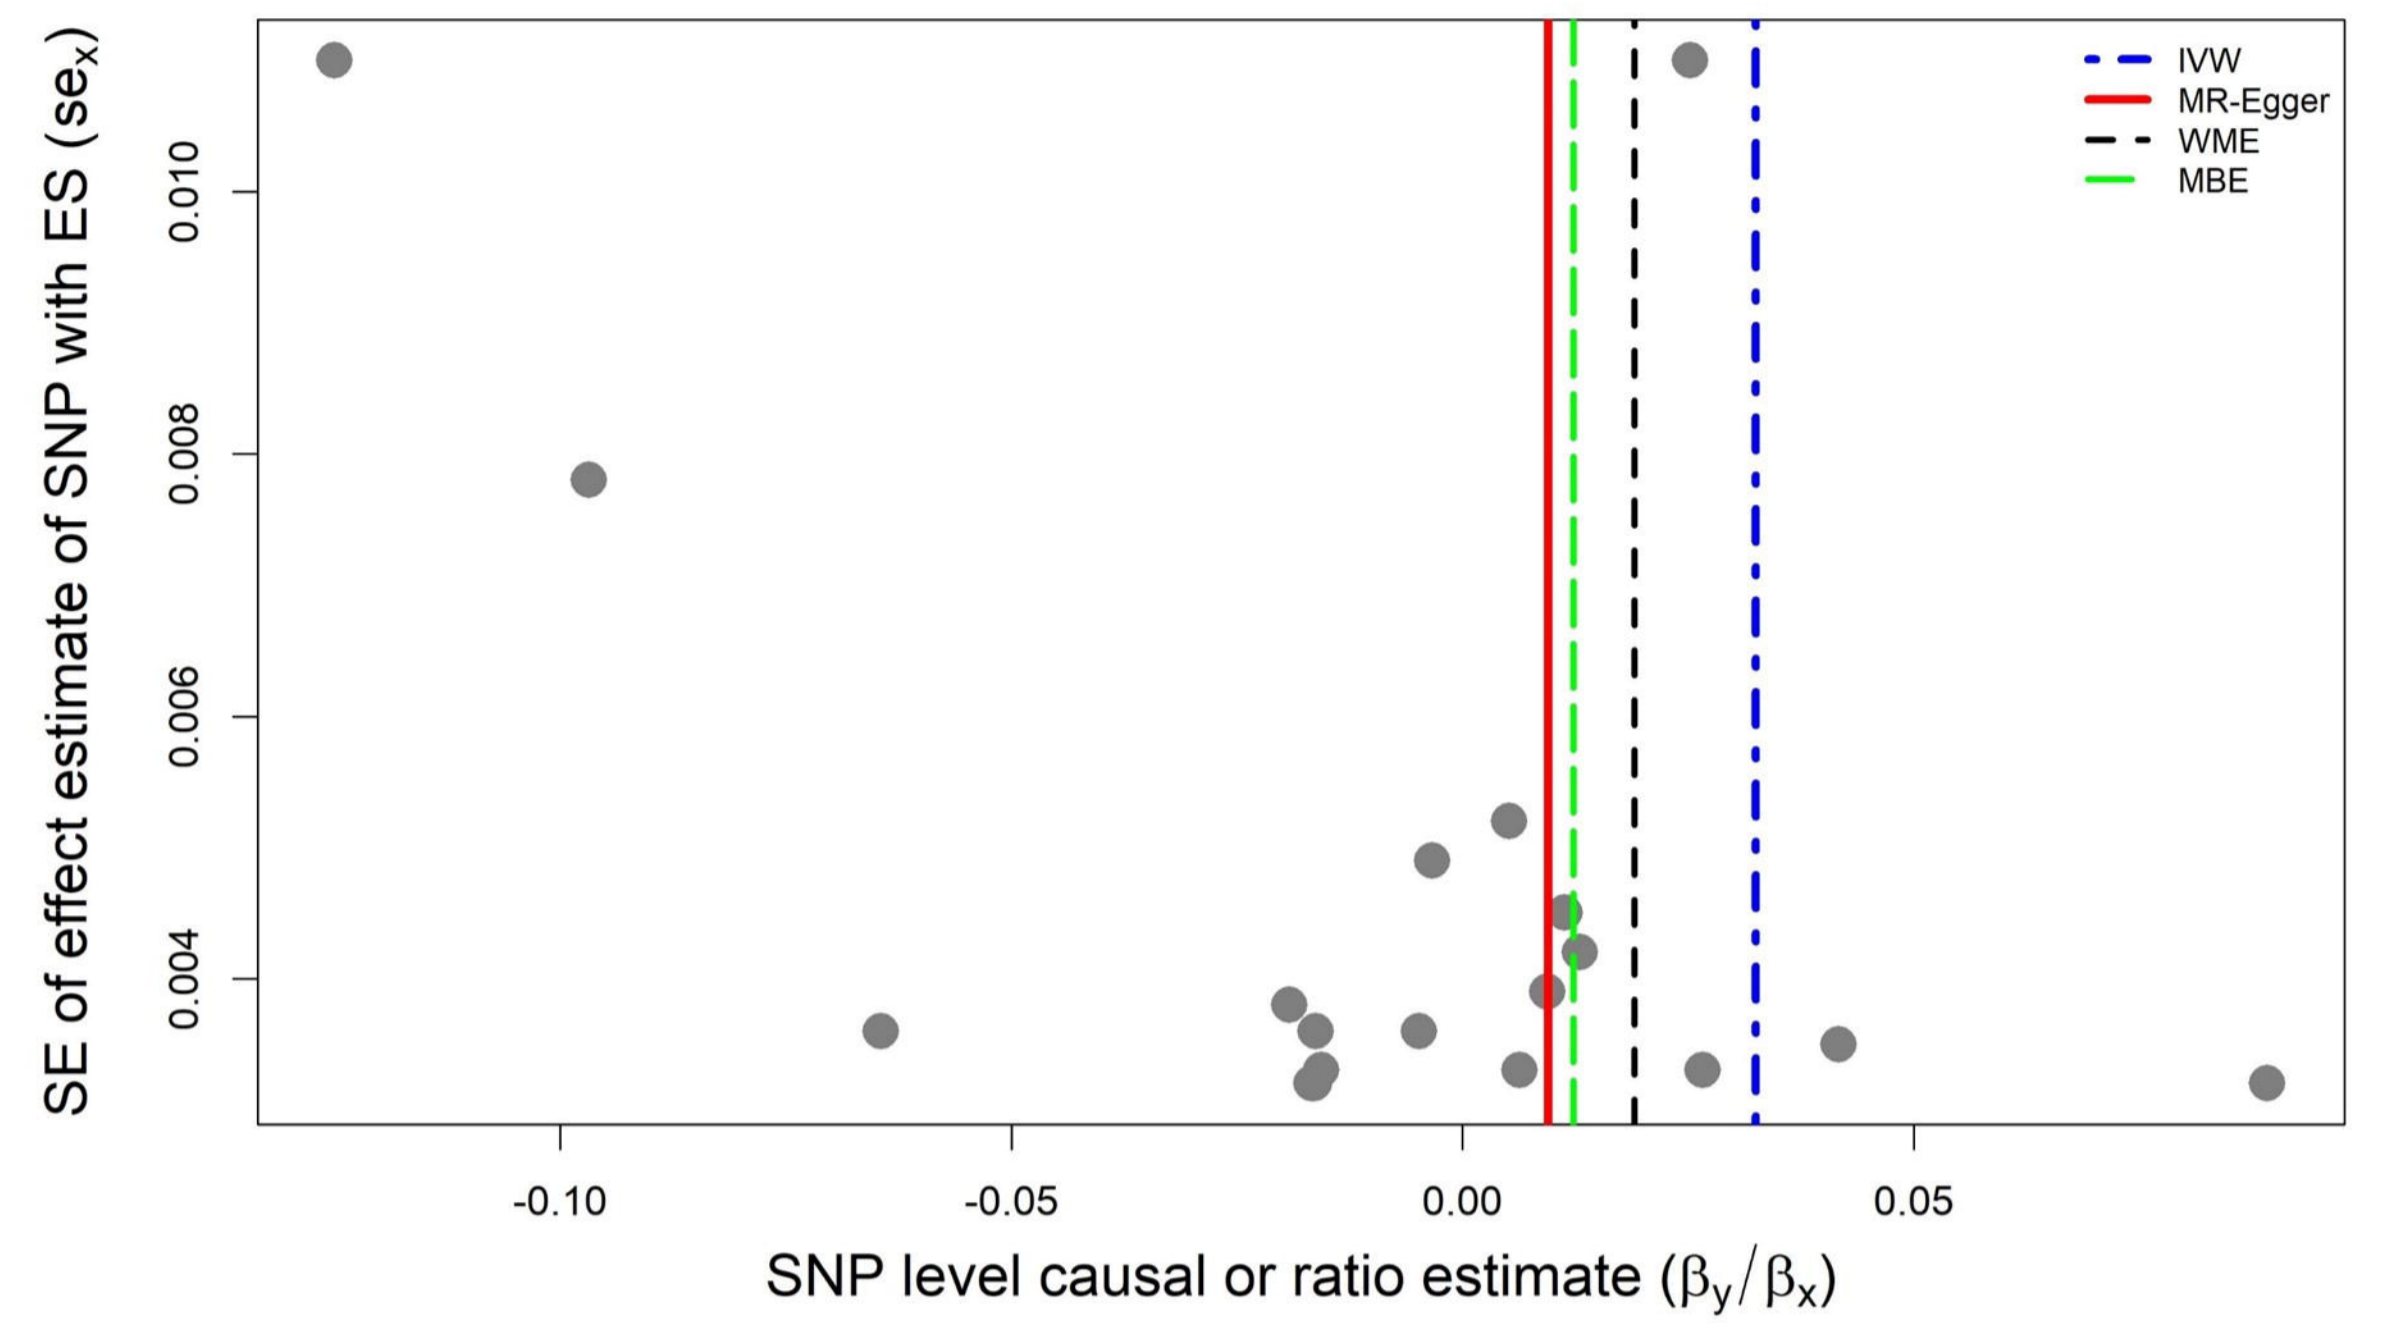**C**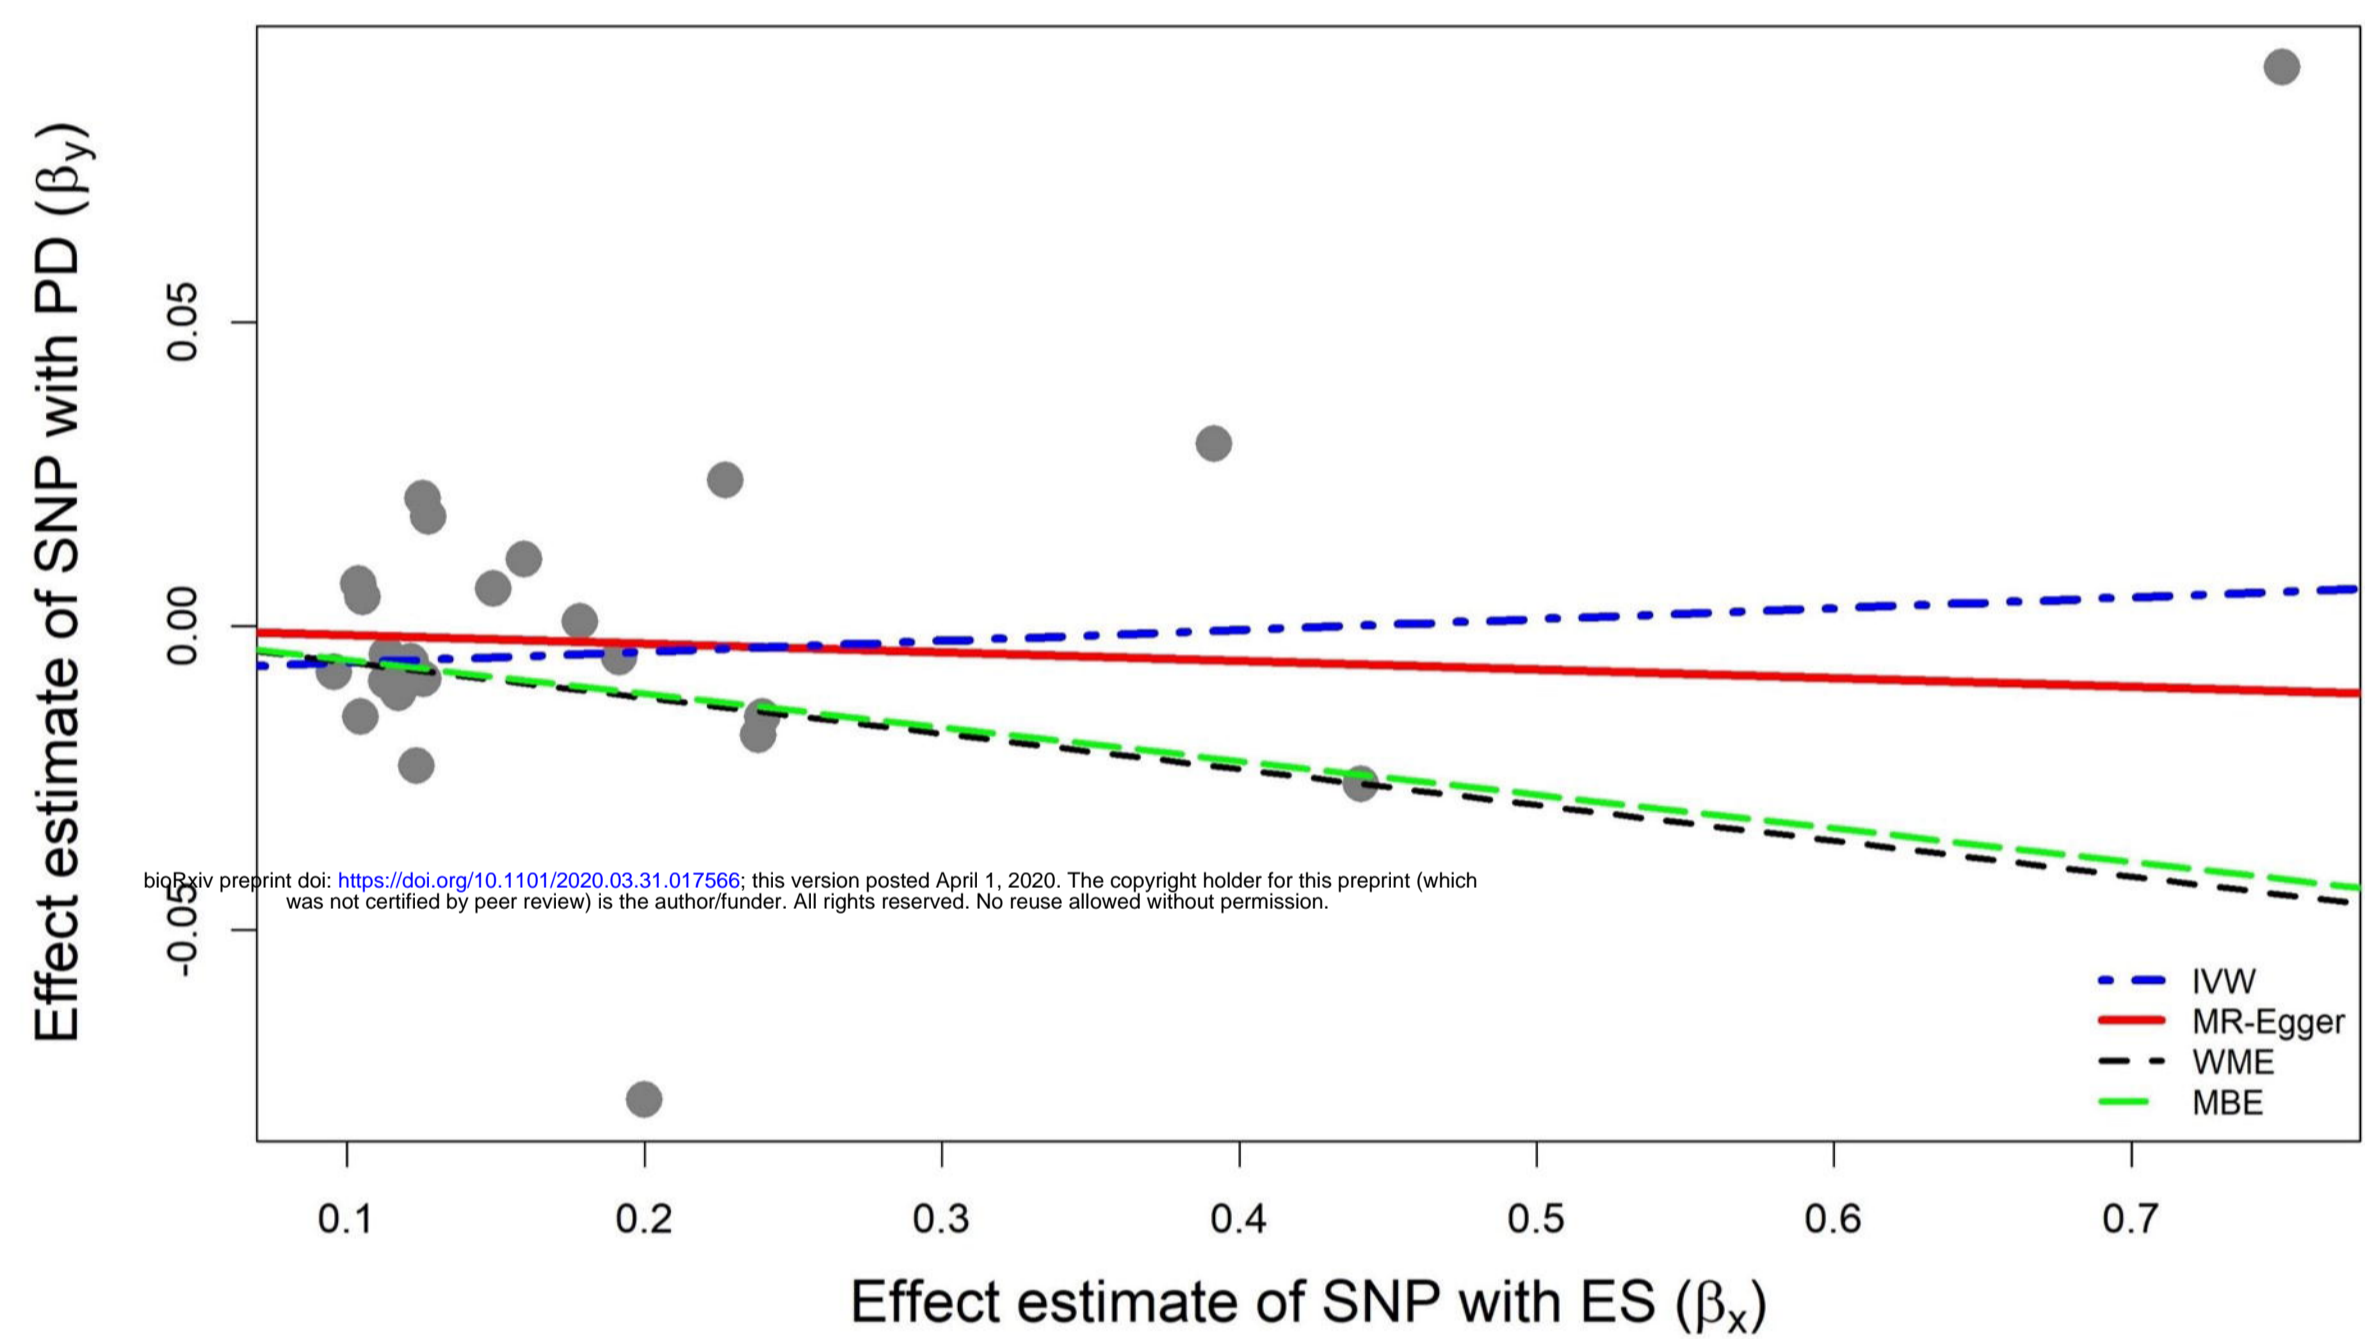**D**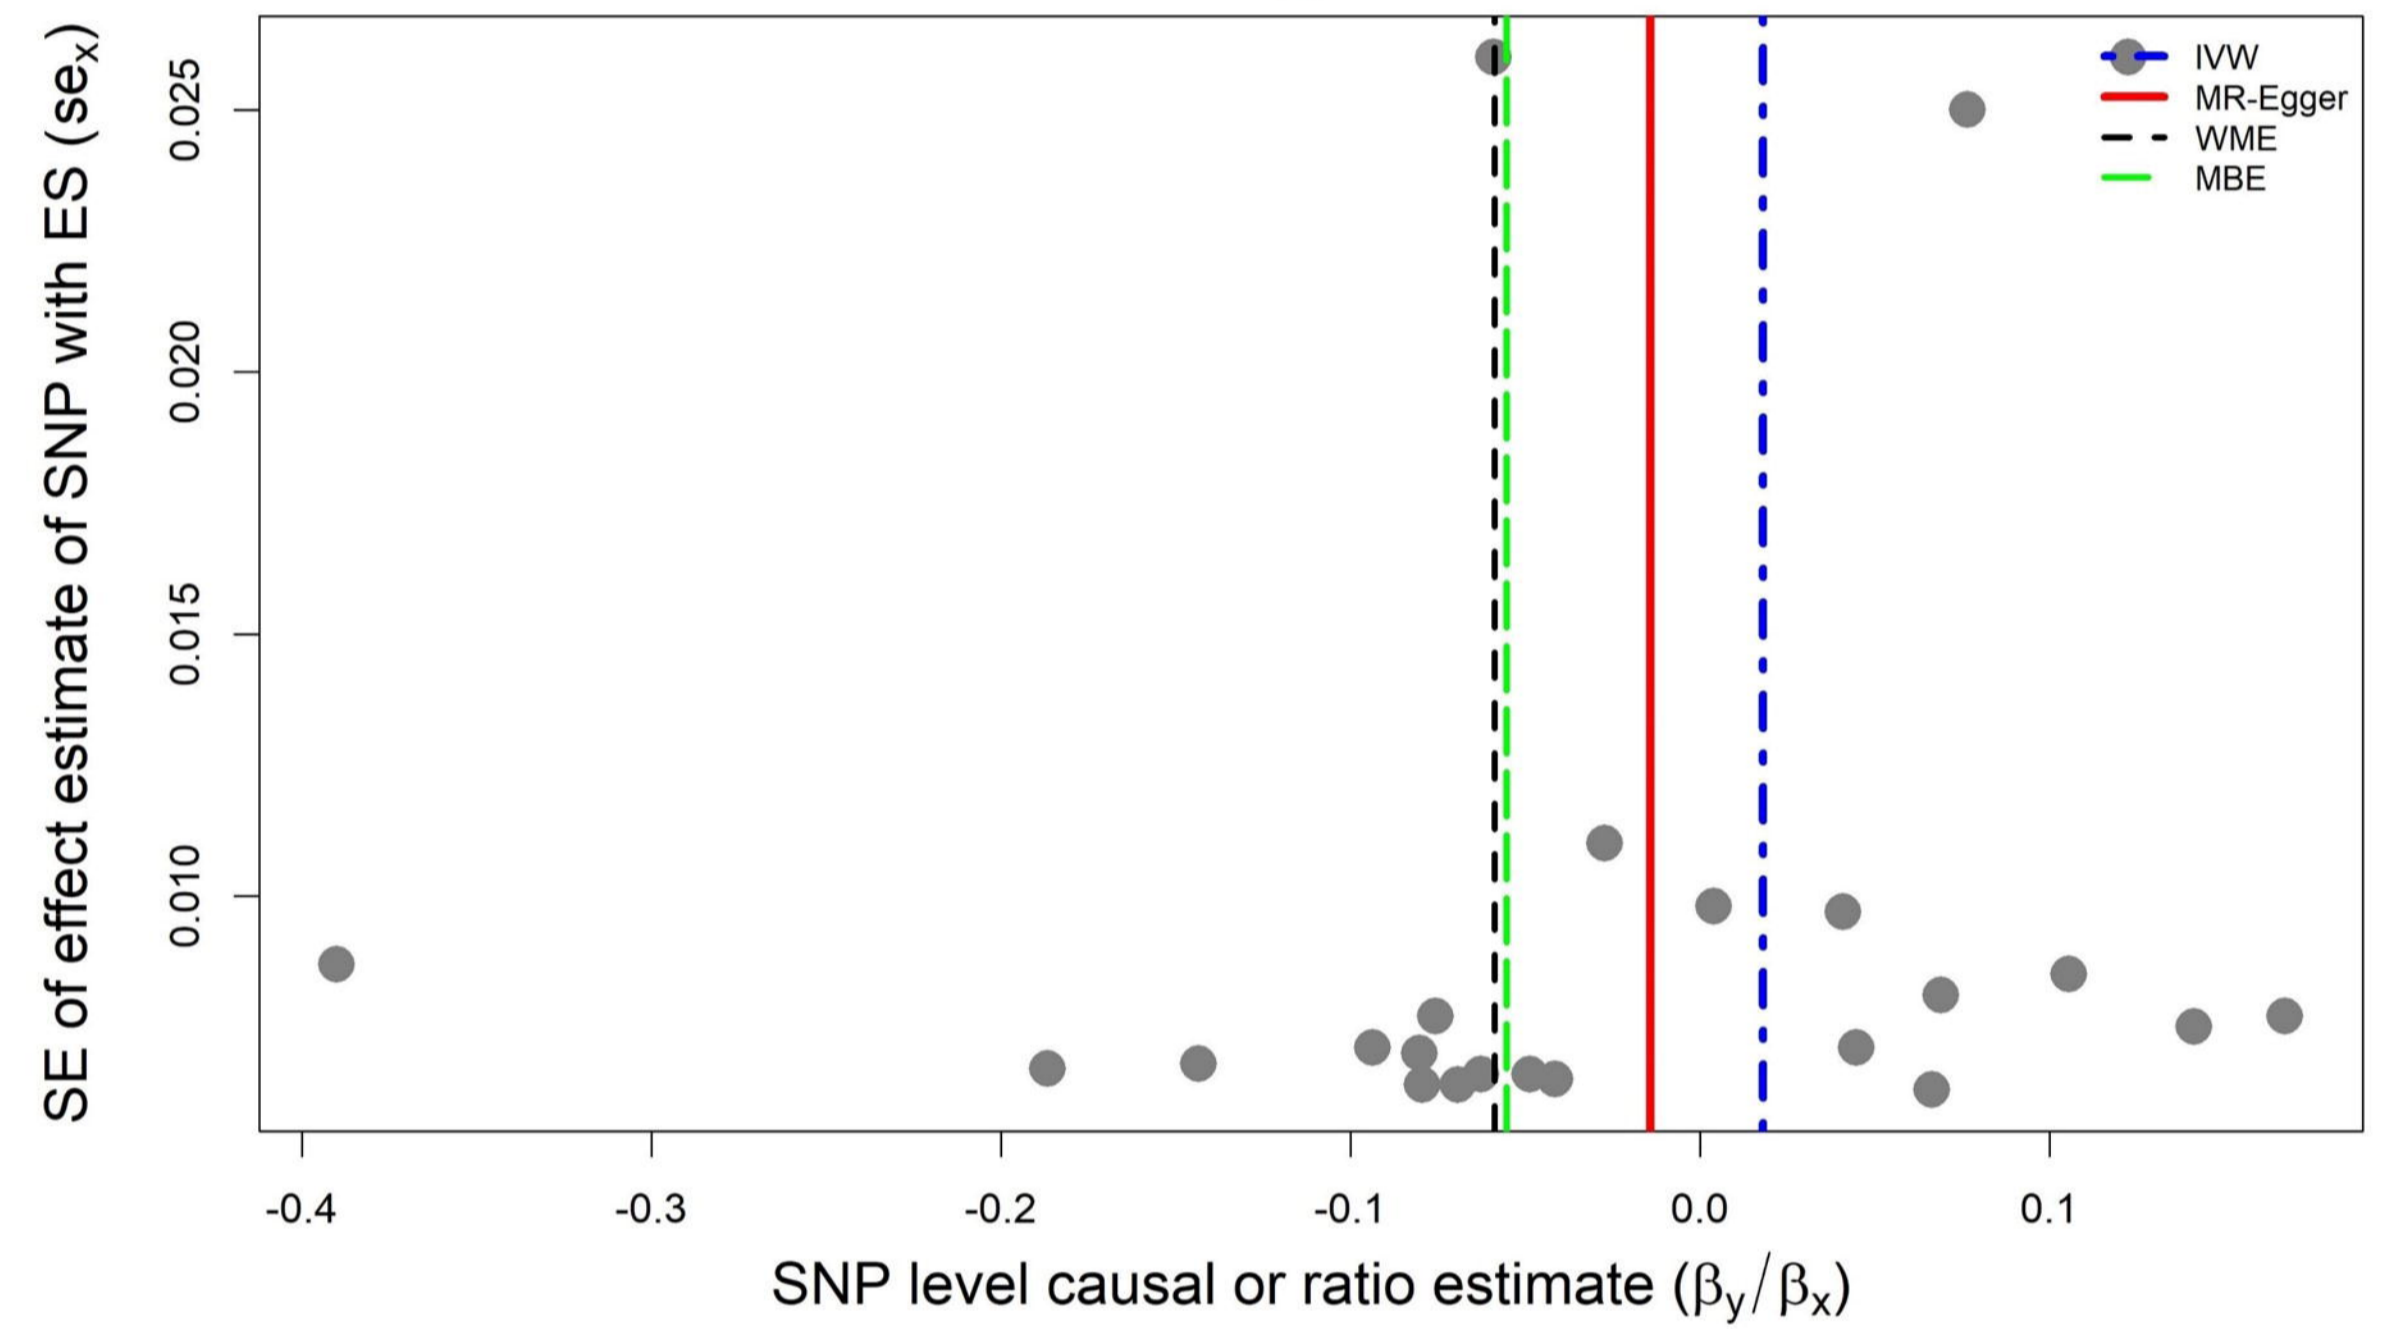**E**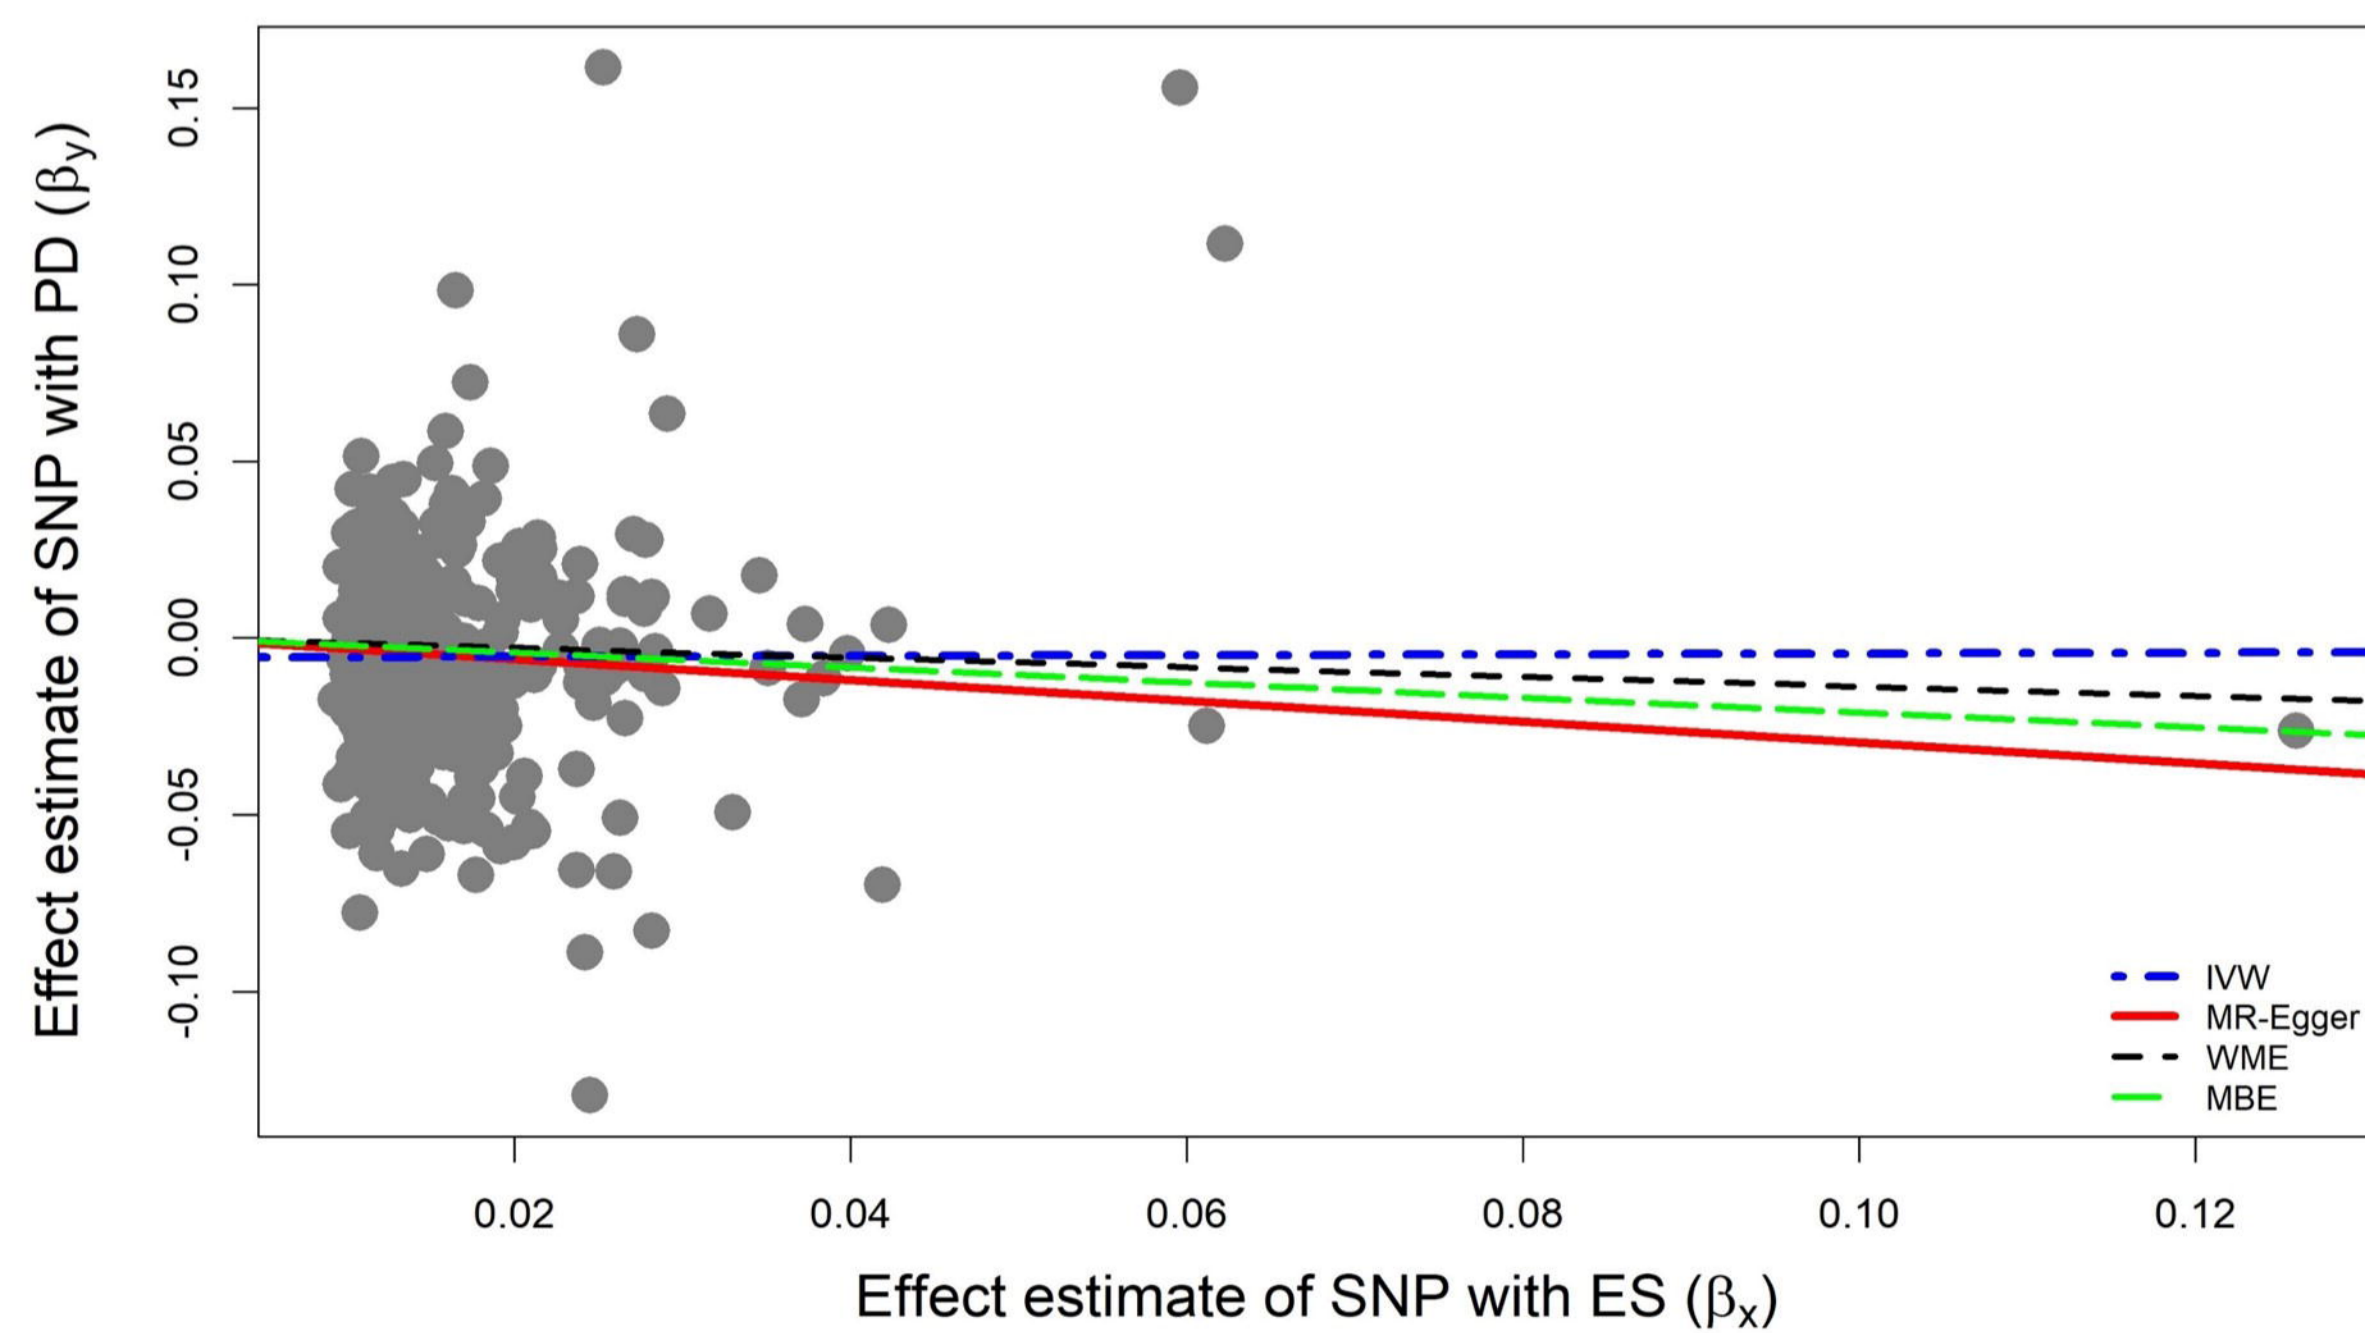**F**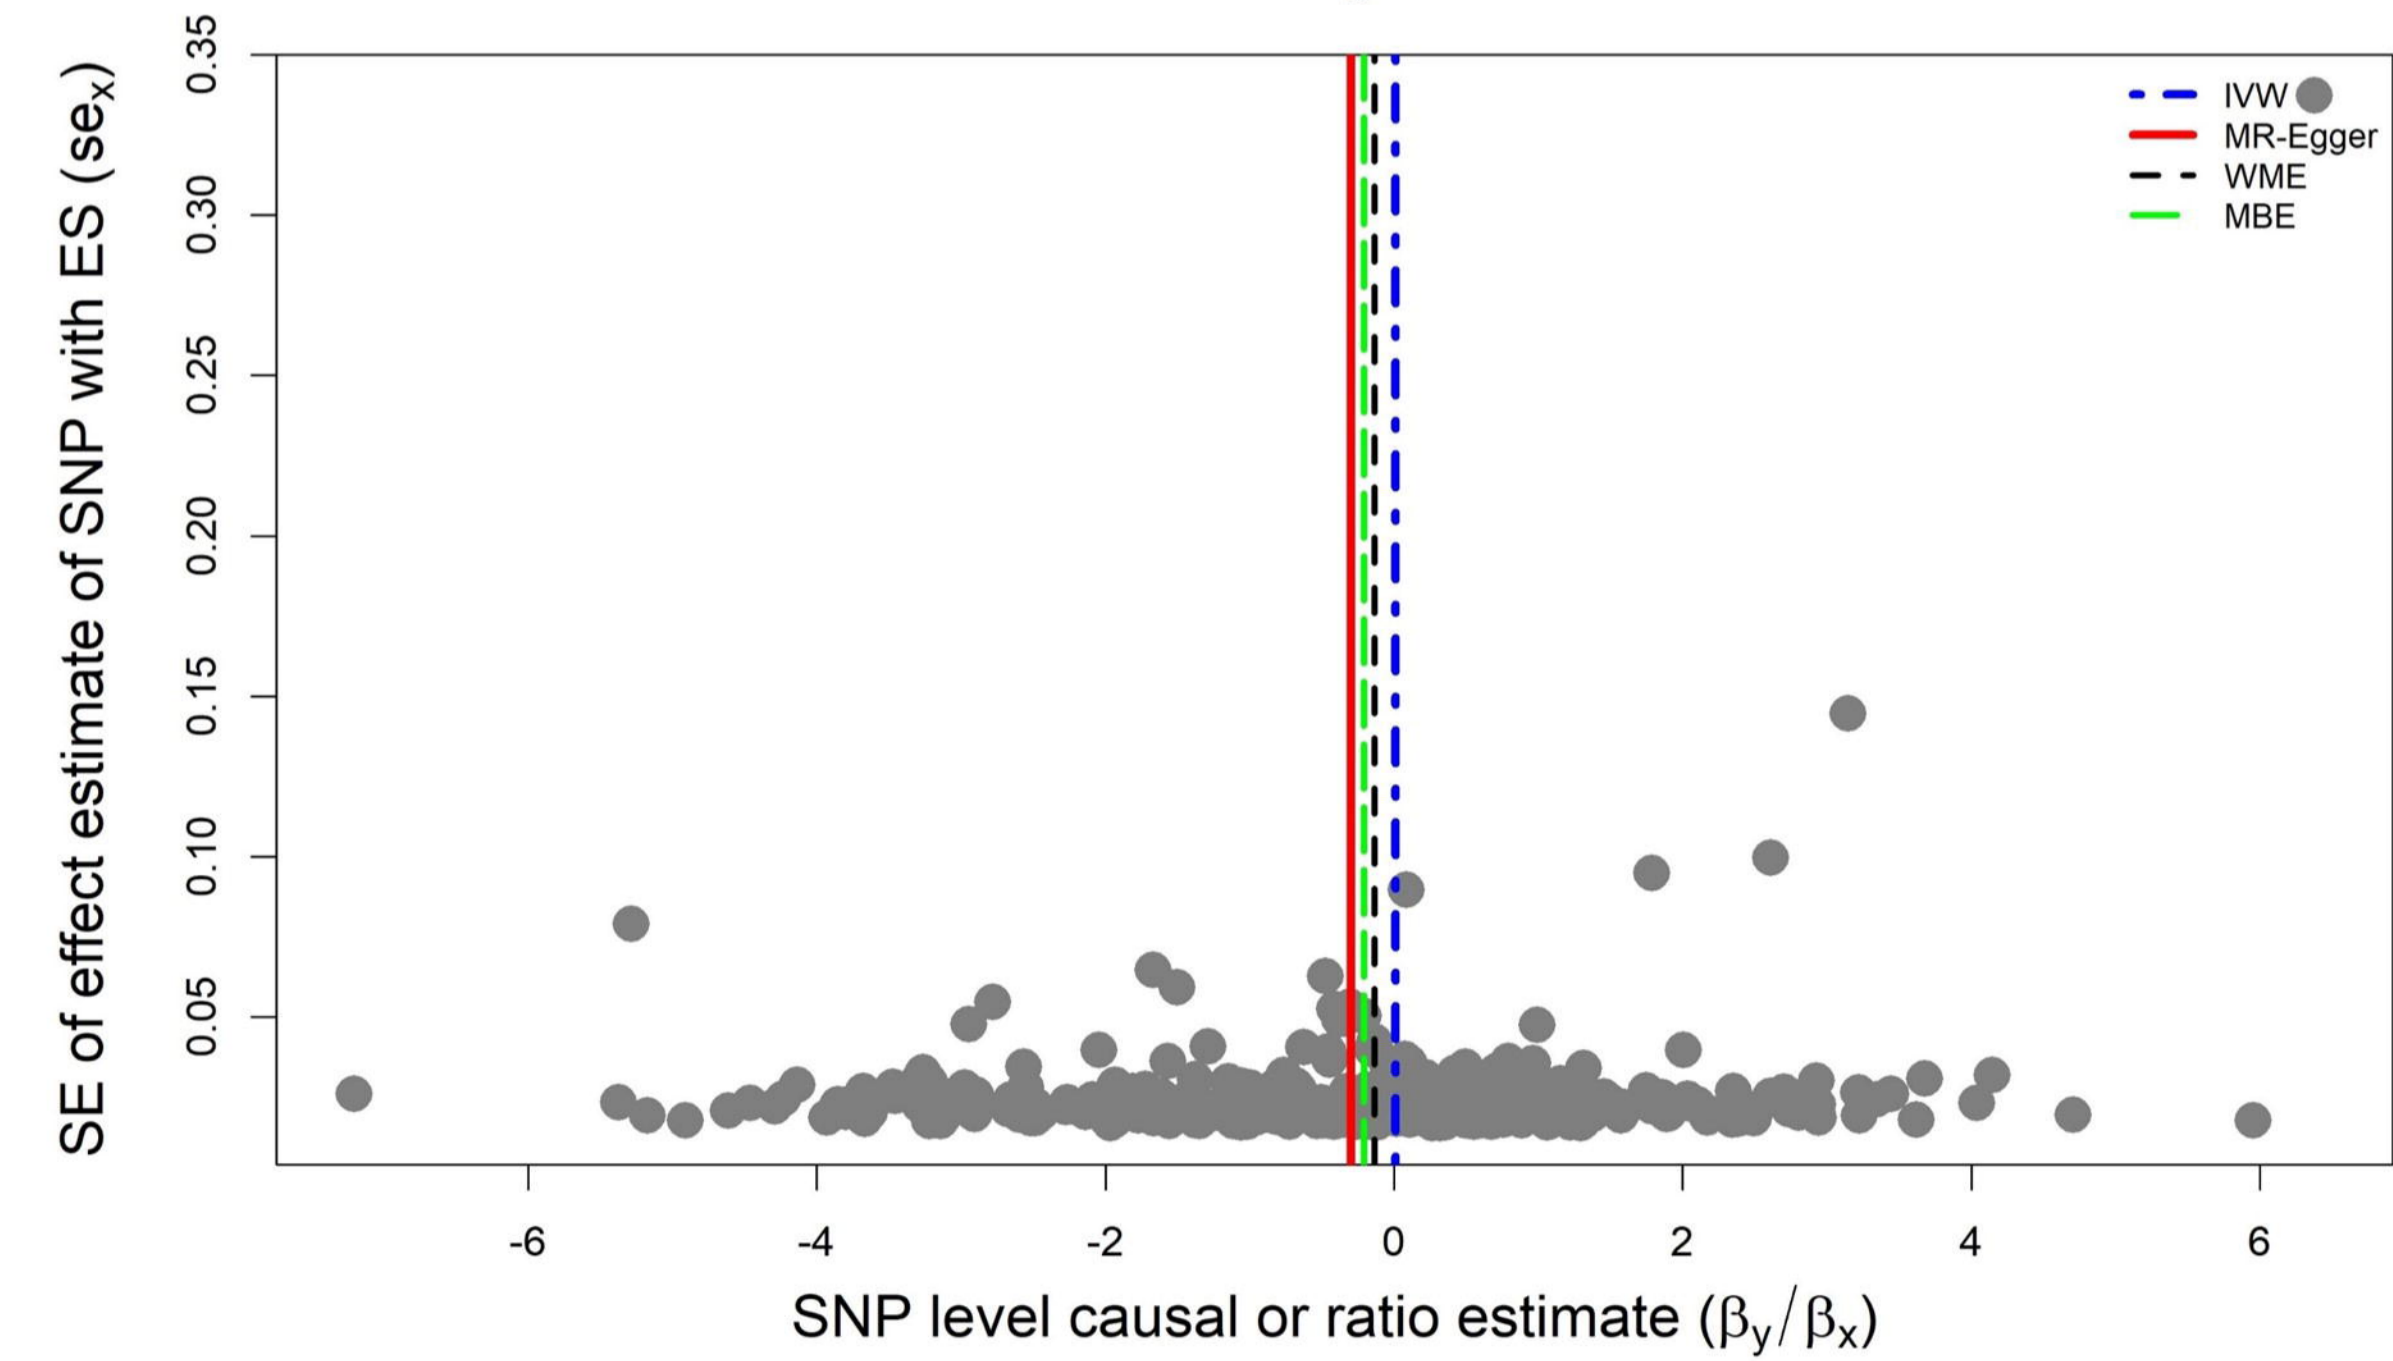

**Type 2 Diabetes (T2D)**

**Parkinsons Disease (PD)**

**Fasting Glucose (FG)**

**Waist Hip Ratio (WHR)**

OR = 4.19 (1.84-9.56); P = 0.0016

$\beta = 0.11$  (0.09-0.13); P = <0.0001

OR = 1.18 (0.86-1.62); P = 0.2910

$\beta = 0.02$  (0.006-0.03); P = 0.055

OR = 0.95 (0.93-0.96); P = 0.0051

OR = 1.03 (0.97-1.09); P = 0.2780

OR = 2.96 (2.60-3.36); P < 0.001

$\beta = 0.07$  (0.05-0.09); P < 0.0001

OR = 0.73 (0.62-0.87); P = 0.0003

$\beta = -0.008$  (-0.03-0.01); P = 0.4288

OR = 0.98 (0.94-1.03); P = 0.5572

$\beta = 0.09$  (0.06-0.12); P < 0.0001
